# Supplementary material for: Structural variation of protein–ligand complexes of the first bromodomain of BRD4
Source: Royal Society of Chemistry journal article supplement (doi:10.1039/d1ob00658d), 2021-01-01
Supplement: d1ob00658d1.csv [file d1ob00658d1.csv]

PDB ID	Chain ID	Primary Citation Author	Pub. Year	DOI	Resolution	Structure of Ligand SMILES [idcode]	Ligand SMILES	HET ID	pIC50	IC50 (nM)	Ki (nM)	Kd (nM)	EC50 (nM)
5UVW	A	Park, C.H.			2.14	e`\\BL@LDbhDOE`@cZP~dLddJTrTtRbRbRfLQrabUQSUsruPADsUS@pDT@@@	CCS(=O)(=O)Nc1ccc(c(c1)C2=CN(C(=O)c3c2cc[nH]3)C)Oc4ccc(cc4F)F	8NG	8.82	1.5
6C7R	A	Zhao, Y., Zhou, B., Bai, L., Liu, L., Yang, C.Y., Meagher, J.L., Stuckey, J.A., McEachern, D., Przybranowski, S., Wang, M., Ran, X., Aguilar, A., Hu, Y., Kampf, J.W., Li, X., Zhao, T., Li, S., Wen, B., Sun, D., Wang, S.	2018	10.1021/acs.jmedchem.8b00483	1.5	ehV^D@@HOLbjim`ELdRbQbbRVRRbrTtQTpHL\BbJZvn~AiZ``bhBJfjj@X@@	Cc1c(c(on1)C)c2cc3c(cc2OC)c4c([nH]3)nc(nc4Nc5cc(nn5C)C6CC6)C	EO4	8.7	2		2.2 (BMOAD_5639)
5AD3	A	Waring, M.J., Chen, H., Rabow, A.A., Walker, G., Bobby, R., Boiko, S., Bradbury, R.H., Callis, R., Clark, E., Dale, I., Daniels, D.L., Dulak, A., Flavell, L., Holdgate, G., Jowitt, T.A., Kikhney, A., Mcalister, M., Ogg, D., Patel, J., Petteruti, P., Robb, G.R., Robers, M.B., Saif, S., Stratton, N., Svergun, D.I., Wang, W., Whittaker, D., Wilson, D.M., Yao, Y.	2016	10.1038/nchembio.2210	1.49	enSUL@@AKHniekobZPAl\dTRRVbTtRRTvbRLrTtRxdRZJzfVAQIihHHjZijjVffiXjh@@	CN(CCOc1ccc(cc1)C2CCN(CC2)c3ccc4nnc(n4n3)OC)c5ccc6nnc(n6n5)OC	K6K	8.102373	7.9
6FNX	A	Hoffer, L., Voitovich, Y.V., Raux, B., Carrasco, K., Muller, C., Fedorov, A.Y., Derviaux, C., Amouric, A., Betzi, S., Horvath, D., Varnek, A., Collette, Y., Combes, S., Roche, P., Morelli, X.	2018	10.1021/acs.jmedchem.8b00653	1.19	fbmH`@DXxXBlbbbTRRTJRSAZMGKUTrpPQP@@	CCn1cnc2c1C(=O)NC(=O)N2Cc3ccccc3	DYZ	8	10
6HDQ	A	Bamborough, P., Chung, C.W., Furze, R.C., Grandi, P., Michon, A.M., Watson, R.J., Mitchell, D.J., Barnett, H., Prinjha, R.K., Rau, C., Sheppard, R.J., Werner, T., Demont, E.H.	2018	10.1021/acs.jmedchem.8b00862	1.7	ef]ZHD@KOBnd[`IABPrJSIYIQQQKJEQIISSIYL\^IIYCS[OXduUUUUUPDESA@UPaBdtQdRP@	Cc1cc(cnc1)c2cnc(c3c2C=C(C(=O)N3)C)N[C@@H]4C[C@H]5CC[C@@H]([C@H]4CCC6CCC(CC6)(F)F)N5	FZE	8	10
6TPZ	A	Wellaway, C.R., Amans, D., Bamborough, P., Barnett, H., Bit, R.A., Brown, J.A., Carlson, N.R., Chung, C.W., Cooper, A.W.J., Craggs, P.D., Davis, R.P., Dean, T.W., Evans, J.P., Gordon, L., Harada, I.L., Hirst, D.J., Humphreys, P.G., Jones, K.L., Lewis, A.J., Lindon, M.J., Lugo, D., Mahmood, M., McCleary, S., Medeiros, P., Mitchell, D.J., O'Sullivan, M., Le Gall, A., Patel, V.K., Patten, C., Poole,…	2020	10.1021/acs.jmedchem.9b01670	1.3	eodRB@@DEMN`JfglbbbbjbTRTRRVRaRXDLlrJn^ZifZhJBjjj``@@	CC1=CC(=CN(C1=O)C)c2nc3cc(ccc3n2C(COC)COC)N4CCOCC4	NV2	7.9
4Z1Q	A	Taylor, A.M., Vaswani, R.G., Gehling, V.S., Hewitt, M.C., Leblanc, Y., Audia, J.E., Bellon, S., Cummings, R.T., Cote, A., Harmange, J.C., Jayaram, H., Joshi, S., Lora, J.M., Mertz, J.A., Neiss, A., Pardo, E., Nasveschuk, C.G., Poy, F., Sandy, P., Setser, J.W., Sims, R.J., Tang, Y., Albrecht, B.K.	2016	10.1021/ml500411h	1.4	egdV@H@NKJfek`HcHhdlhheDhdeiiTmPqXEyeTul]@ATEATRp@QDPFH@	Cc1nnc2n1-c3ccc(cc3N(C[C@H]2C)c4ccc(cc4)Cl)c5ccc(nc5)N	558	7.823909	15
6CKS	A	Bennett, M.J., Wu, Y., Boloor, A., Matuszkiewicz, J., O'Connell, S.M., Shi, L., Stansfield, R.K., Del Rosario, J.R., Veal, J.M., Hosfield, D.J., Xu, J., Kaldor, S.W., Stafford, J.A., Betancort, J.M.	2018	10.1016/j.bmcl.2018.04.016	1.72	eod\BH@HckhDGN`@cIICDeiheDeDleXeiMHljackehHHfBhIJVbH@@	CCS(=O)(=O)c1ccc(c(c1)C2=CN(C(=O)c3c2cc(cc3)c4cnn(c4)C)C)OC	F5Y	7.823909	15
2YEL	A	Chung, C.W., Coste, H., White, J.H., Mirguet, O., Wilde, J., Gosmini, R.L., Delves, C., Magny, S.M., Woodward, R., Hughes, S.A., Boursier, E.V., Flynn, H., Bouillot, A.M., Bamborough, P., Brusq, J.M., Gellibert, F.J., Jones, E.J., Riou, A.M., Homes, P., Martin, S.L., Uings, I.J., Toum, J., Clement, C.A., Boullay, A.B., Grimley, R.L., Blandel, F.M., Prinjha, R.K., Lee, K., Kirilovsky, J., Nicodeme…	2011	10.1021/jm200108t	1.65	e`RZD@@LNCKD`DLbbRTTRbRbTVTrrROePVRQVsuwsUU@lEU@A@@BDEB@@	Cc1nnc2n1-c3ccccc3C(=N[C@H]2NC(=O)OCc4ccccc4)c5ccccc5	WSH	7.809668	15.5		19-52.5 (BDB), 52.5 (PDBbind)
5YOV	A	Hu, J., Wang, Y., Li, Y., Cao, D., Xu, L., Song, S., Damaneh, M.S., Li, J., Chen, Y., Wang, X., Chen, L., Shen, J., Miao, Z., Xiong, B.	2018	10.1016/j.ejmech.2018.02.070	1.45	ek`\D@@DFB`LlbbbbfrTVRLrbbQXDL|BbVvZj``hjZ@`hbCA@@	Cc1ccc(c(c1)C)NC(=O)c2ccc3c(c2)N([C@@H](C(=O)N3C)C)C4CCCC4	8XR	7.679854	20.9
4BJX	A	Wyce, A., Ganji, G., Smitheman, K.N., Chung, C., Korenchuk, S., Bai, Y., Barbash, O., Le, B., Craggs, P.D., Mccabe, M.T., Kennedy-Wilson, K.M., Sanchez, L.V., Gosmini, R.L., Parr, N., Mchugh, C.F., Dhanak, D., Prinjha, R.K., Auger, K.R., Tummino, P.J.	2013	10.1371/journal.pone.0072967	1.59	eodTLH@NGJkg`HcHhdleEDhddmMBeeJFKG@lemh@JhJBbX@IbA@RVP@	C[C@H]1C[C@H](c2cc(ccc2N1C(=O)C)c3ccc(cc3)C(=O)O)Nc4ccc(cc4)Cl	73B	7.657577	22		4.4-23 (BDB)
4F3I<NL>6DUV	A	Zhang, G., Liu, R., Zhong, Y., Plotnikov, A.N., Zhang, W., Zeng, L., Rusinova, E., Gerona-Nevarro, G., Moshkina, N., Joshua, J., Chuang, P.Y., Ohlmeyer, M., He, J.C., Zhou, M.M.<NL>Babault, N., Zhang, Q., Zhang, G., Zhou, M.M., Zeng, L.	2012<NL>	10.1074/jbc.M112.359505<NL>	1.4<NL>1.8	fc Ha@AAst\pQG`cHhdlheEEEDllhkQe`~cWl@DtuTsUMQSAR@@	Cc1c(sc-2c1C(=N[C@H](c3n2c(nn3)C)CC(=O)OC)c4ccc(cc4)Cl)C	0S6	7.522879<NL>7.78	30<NL>16.7	17 (BDB)<NL>	36.1 (PDBbind)<NL>
4LRG	A	Gehling, V.S., Hewitt, M.C., Vaswani, R.G., Leblanc, Y., Cote, A., Nasveschuk, C.G., Taylor, A.M., Harmange, J.C., Audia, J.E., Pardo, E., Joshi, S., Sandy, P., Mertz, J.A., Sims, R.J., Bergeron, L., Bryant, B.M., Bellon, S., Poy, F., Jayaram, H., Sankaranarayanan, R., Yellapantula, S., Bangalore Srinivasamurthy, N., Birudukota, S., Albrecht, B.K.	2013	10.1021/ml4001485	2.21	fmopa@A]gdXHcpPdrnrsLr{ltYXOhu{@AMMUMUSPsAR@@	Cc1c(sc-2c1C(=N[C@H](c3c2c(no3)C)CC(=O)N)c4ccc(cc4)Cl)C	1XB	7.585027	26
5HLS	A	Albrecht, B.K., Gehling, V.S., Hewitt, M.C., Vaswani, R.G., Cote, A., Leblanc, Y., Nasveschuk, C.G., Bellon, S., Bergeron, L., Campbell, R., Cantone, N., Cooper, M.R., Cummings, R.T., Jayaram, H., Joshi, S., Mertz, J.A., Neiss, A., Normant, E., O'Meara, M., Pardo, E., Poy, F., Sandy, P., Supko, J., Sims, R.J., Harmange, J.C., Taylor, A.M., Audia, J.E.	2016	10.1021/acs.jmedchem.5b01882	2.18	fewpb@AMFghHaIe]efYU]fcK^cTkX@IhJ`jIhQ`i@@	Cc1c-2c(on1)[C@@H](N=C(c3c2cccc3)c4ccc(cc4)Cl)CC(=O)N	62G	7.408935	39
4O74<NL>4OGI	A	Ember, S.W., Zhu, J.Y., Olesen, S.H., Martin, M.P., Becker, A., Berndt, N., Georg, G.I., Schonbrunn, E.<NL>Ciceri, P., Muller, S., O'Mahony, A., Fedorov, O., Filippakopoulos, P., Hunt, J.P., Lasater, E.A., Pallares, G., Picaud, S., Wells, C., Martin, S., Wodicka, L.M., Shah, N.P., Treiber, D.K., Knapp, S.	2014	10.1021/cb500072z<NL>10.1038/nchembio.1471	1.45<NL>1.73	efU^L@@DFCKLgbPNklbbbbfRRfrQTTRQTrbRs@e`TRTvvIKUTEAQUAADuUUDTFB@@	CC[C@@H]1C(=O)N(c2cnc(nc2N1C3CCCC3)Nc4ccc(cc4OC)C(=O)NC5CCN(CC5)C)C	R78	7.60206<NL>7.06	25<NL>87		<NL>37 (BMOAD_5621)
6JJB	A	Jiang, F., Hu, Q., Zhang, Z., Li, H., Li, H., Zhang, D., Li, H., Ma, Y., Xu, J., Chen, H., Cui, Y., Zhi, Y., Zhang, Y., Xu, J., Zhu, J., Lu, T., Chen, Y.	2019	10.1021/acs.jmedchem.9b01010	1.51	fewPR@LU`aTpAFRREQQQJIKQUSHt_IKvkUj@H@H@hdB@@	CN1c2ccc(c3c2c(ccc3)C1=O)NS(=O)(=O)c4ccccc4OC	BT0	7.305395	49.5
6CKR	A	Bennett, M.J., Wu, Y., Boloor, A., Matuszkiewicz, J., O'Connell, S.M., Shi, L., Stansfield, R.K., Del Rosario, J.R., Veal, J.M., Hosfield, D.J., Xu, J., Kaldor, S.W., Stafford, J.A., Betancort, J.M.	2018	10.1016/j.bmcl.2018.04.016	1.62	ek`RLH@L@emhDJ`@cIIChdiiheDdeXeiM@hlfemej@HdJBRehb@@@	Cn1cc(cn1)c2ccc3c(c2)C(=CN(C3=O)C)c4cccc(c4)NS(=O)(=O)C	F5V	7.30103	50
4UIX	A	Theodoulou, N.H., Bamborough, P., Bannister, A.J., Becher, I., Bit, R.A., Che, K.H., Chung, C., Dittmann, A., Drewes, G., Drewry, D.H., Gordon, L., Grandi, P., Leveridge, M., Lindon, M., Michon, A., Molnar, J., Robson, S.C., Tomkinson, N.C.O., Kouzarides, T., Prinjha, R.K., Humphreys, P.G.	2016	10.1021/acs.jmedchem.5b00256	1.58	e`\TFD@AJhDEBmg`@`pHrRPiYJZIIJJJEKSKL\N^YUKGKUUMMUKAAETp@@@	CN1C=C(c2c(cc(s2)C(=O)NC3CCS(=O)(=O)CC3)C1=O)c4ccc(c(c4)OC)OC	TVU	7.30103	50
4QR5	A	Zhao, L., Wang, Y., Cao, D.Y., Chen, T.T., Wang, Q., Li, Y., Xu, Y.C., Zhang, N., Wang, X., Chen, D., Chen, L., Chen, Y.L., Xia, G., Shi, Z., Liu, Y.C., Lin, Y., Miao, Z., Shen, J., Xiong, B.	2015	10.1021/jm501504k	1.41	fmopQ@LNSAAU`BNaFRREQQIIQGQQKQZ|Zs^cfmPTEQTmUIT@@	c1c(cc(cc1NC(=O)C2CC2)S(=O)(=O)NC3CCCC3)C4=CSC(=O)N4	BNM	7.221849	60
6TPY	A	Wellaway, C.R., Amans, D., Bamborough, P., Barnett, H., Bit, R.A., Brown, J.A., Carlson, N.R., Chung, C.W., Cooper, A.W.J., Craggs, P.D., Davis, R.P., Dean, T.W., Evans, J.P., Gordon, L., Harada, I.L., Hirst, D.J., Humphreys, P.G., Jones, K.L., Lewis, A.J., Lindon, M.J., Lugo, D., Mahmood, M., McCleary, S., Medeiros, P., Mitchell, D.J., O'Sullivan, M., Le Gall, A., Patel, V.K., Patten, C., Poole,…	2020	10.1021/acs.jmedchem.9b01670	1.8	figp`@DJt@^QQQQUQJIIIPiLDZr\}FuSLuPPUUA@@@	CC1=CC(=CN(C1=O)C)c2nc3ccccc3n2CC4CCOCC4	NUB	7.1
5I80	A	Crawford, T.D., Tsui, V., Flynn, E.M., Wang, S., Taylor, A.M., Cote, A., Audia, J.E., Beresini, M.H., Burdick, D.J., Cummings, R., Dakin, L.A., Duplessis, M., Good, A.C., Hewitt, M.C., Huang, H.R., Jayaram, H., Kiefer, J.R., Jiang, Y., Murray, J., Nasveschuk, C.G., Pardo, E., Poy, F., Romero, F.A., Tang, Y., Wang, J., Xu, Z., Zawadzke, L.E., Zhu, X., Albrecht, B.K., Magnuson, S.R., Bellon, S., Co…	2016	10.1021/acs.jmedchem.6b00264	1.45	ffcp`@DLrANQQQQYHqISPs`iJ}EjiZ`BFjP@@	CN1C=C(c2cc[nH]c2C1=O)c3cccc(c3)C(=O)N(C)C	67B	7.036212	92
3ZYU	A	Dawson, M.A., Prinjha, R.K., Dittman, A., Giotopoulos, G., Bantscheff, M., Chan, W.I., Robson, S.C., Chung, C.W., Hopf, C., Savitski, M.M., Huthmacher, C., Gudgin, E., Lugo, D., Beinke, S., Chapman, T.D., Roberts, E.J., Soden, P.E., Auger, K.R., Mirguet, O., Doehner, K., Delwel, R., Burnett, A.K., Jeffrey, P., Drewes, G., Lee, K., Huntly, B.J., Kouzarides, T.	2011	10.1038/nature10509	1.5	eolZL@@DLKOK`JmdfYVV[U]]{fHXt|bJrZvnZjJ@@@BJZf@JBb@@	Cc1c(c(on1)C)c2cc3c(cc2OC)c4c(cn3)NC(=O)N4[C@H](C)c5ccccn5	1GH	7	100	9-75 (BDB)	53-215 (BDB), 100 (PDBbind)
6JJ3	A	Jiang, F., Hu, Q., Zhang, Z., Li, H., Li, H., Zhang, D., Li, H., Ma, Y., Xu, J., Chen, H., Cui, Y., Zhi, Y., Zhang, Y., Xu, J., Zhu, J., Lu, T., Chen, Y.	2019	10.1021/acs.jmedchem.9b01010	1.72	ehZZBH@LKJnohDEC`@cIIBhhheDeeKDeLdccHoLbfnagoej@H@H@bjfj@h@@	CN1CCN(CC1)c2cc3c4c(ccc(c4n2)NS(=O)(=O)c5ccccc5OC)N(C3=O)C	BS6	7	100
5YQX	A	Xue, X., Zhang, Y., Wang, C., Zhang, M., Xiang, Q., Wang, J., Wang, A., Li, C., Zhang, C., Zou, L., Wang, R., Wu, S., Lu, Y., Chen, H., Ding, K., Li, G., Xu, Y.	2018	10.1016/j.ejmech.2018.04.034	1.82	ffsQ`@DEAQNQQJJYIQUQQRgMNMYIVj``hfihjFD@	Cc1c(c(on1)C)c2ccc3c(c2)O[C@@H](C(=O)N3)CC4CC4	E0K	7	100
4O76	A	Ember, S.W., Zhu, J.Y., Olesen, S.H., Martin, M.P., Becker, A., Berndt, N., Georg, G.I., Schonbrunn, E.	2014	10.1021/cb500072z	1.7	eb^^DH@LK@jfkdXD@@cIIBhiDkMheEJhdlhdlXyeUl]BbmPUAD@QP@UUPD@@@	Cc1cnc(nc1Nc2cccc(c2)S(=O)(=O)NC(C)(C)C)Nc3ccc(cc3)N4CCN(CC4)C	1M3	6.886057	130		123 (BDB)
5KJ0	A	Koblan, L.W., Buckley, D.L., Ott, C.J., Fitzgerald, M.E., Ember, S.W., Zhu, J.Y., Liu, S., Roberts, J.M., Remillard, D., Vittori, S., Zhang, W., Schonbrunn, E., Bradner, J.E.	2016	10.1002/cmdc.201600502	1.51	en]^L@@DFCKLojPAglbbbbfRRfrQbfbRJfTRVXDlBbRVNIiZj`hJJjBBIjjjHhLD@@	CC[C@@H]1C(=O)N(c2cnc(nc2N1C3CCCC3)N(C)c4ccc(cc4OC)C(=O)NC5CCN(CC5)C)C	6TB	6.886057	130
5Y8Y	A	Zhang, M., Zhang, Y., Song, M., Xue, X., Wang, J., Wang, C., Zhang, C., Li, C., Xiang, Q., Zou, L., Wu, X., Wu, C., Dong, B., Xue, W., Zhou, Y., Chen, H., Wu, D., Ding, K., Xu, Y.	2018	10.1021/acs.jmedchem.8b00103	1.87	fi{QQ@E]EKPV`qFAFQQISRHiSQIKJTxdk^pABuPPQSA@@@	Cc1c2cc(c(cc2on1)OC)NS(=O)(=O)c3cc(ccc3OC)Br	8PX	6.886057	130
5CQT	A	Xue, X., Zhang, Y., Liu, Z., Song, M., Xing, Y., Xiang, Q., Wang, Z., Tu, Z., Zhou, Y., Ding, K., Xu, Y.	2016	10.1021/acs.jmedchem.5b01511	1.6	figQb@LY`ch@cIIBhhhdeElhUc^\fM\eVhJ@hBhfH`@@	CCN1c2ccc(c3c2c(ccc3)C1=O)S(=O)(=O)NC4CCCCC4	EB3	6.886057	130		124 (BDB)
5Y94	A	Zhang, M., Zhang, Y., Song, M., Xue, X., Wang, J., Wang, C., Zhang, C., Li, C., Xiang, Q., Zou, L., Wu, X., Wu, C., Dong, B., Xue, W., Zhou, Y., Chen, H., Wu, D., Ding, K., Xu, Y.	2018	10.1021/acs.jmedchem.8b00103	2	fi{pQ@EAzJVf`qFAFQQISRHiSQIKJTxdk^pABuPPQSA@@@	Cc1c2cc(c(cc2on1)NC)NS(=O)(=O)c3cc(ccc3OC)Br	8QC	6.823909	150
4NQM	A	Filippakopoulos, P., Picaud, S., Felletar, I., Martin, S., Fedorov, O., von Delft, F., Arrowsmith, C.H., Edwards, A.M., Bountra, C., Knapp, S.			1.58	ejUVLD@IGNehT^AI`H``HrJJIRJzJIQIKQYSQIJIaPKIj[ZxDfEFBAX``hjZ`hE`JH@@	Cc1nnc2n1nc(c3c2cccc3)c4ccc(c(c4)NS(=O)(=O)c5ccccc5Cl)N6CCOCC6	Y1Z	6.8	158.49
5Y8C	A	Zhang, M., Zhang, Y., Song, M., Xue, X., Wang, J., Wang, C., Zhang, C., Li, C., Xiang, Q., Zou, L., Wu, X., Wu, C., Dong, B., Xue, W., Zhou, Y., Chen, H., Wu, D., Ding, K., Xu, Y.	2018	10.1021/acs.jmedchem.8b00103	1.42	fi{QQ@E]EKPV`bFAFQQISRHiSQIKJTxdk^pABuPPQSA@@@	Cc1c2cc(c(cc2on1)OC)NS(=O)(=O)c3cc(ccc3OC)Cl	8P9	6.79588	160
6FSY	A	Jennings, L.E., Schiedel, M., Hewings, D.S., Picaud, S., Laurin, C.M.C., Bruno, P.A., Bluck, J.P., Scorah, A.R., See, L., Reynolds, J.K., Moroglu, M., Mistry, I.N., Hicks, A., Guzanov, P., Clayton, J., Evans, C.N.G., Stazi, G., Biggin, P.C., Mapp, A.K., Hammond, E.M., Humphreys, P.G., Filippakopoulos, P., Conway, S.J.	2018	10.1016/j.bmc.2018.05.003	1.34	ffcQ`@HY@[vRIQHqIQFZIKAMVKVej@Hj@BBCh@	Cc1c(c(on1)C)c2cc(cc(c2)O)[C@H](c3cccnc3)O	E5Q	6.78
5U2C<NL>5U2F	A	Andrews, F.H., Singh, A.R., Joshi, S., Smith, C.A., Morales, G.A., Garlich, J.R., Durden, D.L., Kutateladze, T.G.	2017	10.1073/pnas.1613091114	3.3<NL>2.53	fewQR@KCXIoY`BLdTRbVtRRbrRtIJBUyIVuJuHPTUSUD@@	c1cc(ccc1c2csc3c2OC(=CC3=O)N4CCOCC4)C(=O)NO	82Y	6.714443	193
4UIZ	A	Theodoulou, N.H., Bamborough, P., Bannister, A.J., Becher, I., Bit, R.A., Che, K.H., Chung, C., Dittmann, A., Drewes, G., Drewry, D.H., Gordon, L., Grandi, P., Leveridge, M., Lindon, M., Michon, A., Molnar, J., Robson, S.C., Tomkinson, N.C.O., Kouzarides, T., Prinjha, R.K., Humphreys, P.G.	2016	10.1021/acs.jmedchem.5b00256	1.19	ehR\FD@LIFhDMJco`@bpHrRPsIYSQIIQQPiZYXRSpHikZyZjjZZjVBBJi`@@	CN1C=C(c2c(cc(s2)C(=O)N3CCN(CC3)S(=O)(=O)C)C1=O)c4ccc(c(c4)OC)OC	N1D	6.69897	200
4.00E+96	A	Fish, P.V., Filippakopoulos, P., Bish, G., Brennan, P.E., Bunnage, M.E., Cook, A.S., Federov, O., Gerstenberger, B.S., Jones, H., Knapp, S., Marsden, B., Nocka, K., Owen, D.R., Philpott, M., Picaud, S., Primiano, M.J., Ralph, M.J., Sciammetta, N., Trzupek, J.D.	2012	10.1021/jm3010515	1.92	fakpR@LYKABn`BLddJbbbRRtjRQ`nbVju@D@PUTa@@@	CN1Cc2cc(ccc2NC1=O)NS(=O)(=O)c3ccccc3OC	0NS	6.657577	220		136 (BDB)
5Y8W	A	Zhang, M., Zhang, Y., Song, M., Xue, X., Wang, J., Wang, C., Zhang, C., Li, C., Xiang, Q., Zou, L., Wu, X., Wu, C., Dong, B., Xue, W., Zhou, Y., Chen, H., Wu, D., Ding, K., Xu, Y.	2018	10.1021/acs.jmedchem.8b00103	1.76	fakQQ@EMEKPZ`qFAFQQISRHiSQYIRgDyjv@HVjB@i``@@	Cc1c2cc(c(cc2on1)O)NS(=O)(=O)c3cc(ccc3OC)Br	8PU	6.638272	230
6CZV	A	Kharenko, O.A., Patel, R.G., Brown, S.D., Calosing, C., White, A., Lakshminarasimhan, D., Suto, R.K., Duffy, B.C., Kitchen, D.B., McLure, K.G., Hansen, H.C., van der Horst, E.H., Young, P.R.	2018	10.1021/acs.jmedchem.8b00666	1.88	fj}P`@DI@EIfUvYVYYsqPiZiZA`ibH@@	Cc1c(c(on1)C)C2=CN(C(=O)C=C2)Cc3ccccc3	FOY	6.638272	230
6FT4	A	Jennings, L.E., Schiedel, M., Hewings, D.S., Picaud, S., Laurin, C.M.C., Bruno, P.A., Bluck, J.P., Scorah, A.R., See, L., Reynolds, J.K., Moroglu, M., Mistry, I.N., Hicks, A., Guzanov, P., Clayton, J., Evans, C.N.G., Stazi, G., Biggin, P.C., Mapp, A.K., Hammond, E.M., Humphreys, P.G., Filippakopoulos, P., Conway, S.J.	2018	10.1016/j.bmc.2018.05.003	1.34	fnsPa@NU]dD`bPrJSIYJIJHqQQgK^sVjjh@bZfb@@	Cc1c(c(on1)C)c2cc(cc(c2)O)CN3CCC(CC3)(F)F	E5W	6.63
5U28	A	Andrews, F.H., Singh, A.R., Joshi, S., Smith, C.A., Morales, G.A., Garlich, J.R., Durden, D.L., Kutateladze, T.G.	2017	10.1073/pnas.1613091114	1.8	feoaR@KLDghpABTrr JlvjyJBU{MQ}gTkTaATUUTT@@	c1cc2c(cc1c3csc4c3OC(=CC4=O)N5CCOCC5)OCCO2	82V	6.617983	241
4QR4	A	Zhao, L., Wang, Y., Cao, D.Y., Chen, T.T., Wang, Q., Li, Y., Xu, Y.C., Zhang, N., Wang, X., Chen, D., Chen, L., Chen, Y.L., Xia, G., Shi, Z., Liu, Y.C., Lin, Y., Miao, Z., Shen, J., Xiong, B.	2015	10.1021/jm501504k	1.28	ffcQc@I^xJhH``PTHrJJIRJiQQIHlUENRpPKEUMTe@@@	c1cc(c(cc1C2=CSC(=O)N2)S(=O)(=O)NC3CCCC3)Cl	BNK	6.60206	250
5U2E	A	Andrews, F.H., Singh, A.R., Joshi, S., Smith, C.A., Morales, G.A., Garlich, J.R., Durden, D.L., Kutateladze, T.G.	2017	10.1073/pnas.1613091114	1.99	fmoaR@KLDwhpAFRJIQKZIIQYIZEDhIWde[TkTaAQUMUD@@	CCOC(=O)c1ccc(cc1)c2csc3c2OC(=CC3=O)N4CCOCC4	837	6.55752	277
6FO5	A	Hoffer, L., Voitovich, Y.V., Raux, B., Carrasco, K., Muller, C., Fedorov, A.Y., Derviaux, C., Amouric, A., Betzi, S., Horvath, D., Varnek, A., Collette, Y., Combes, S., Roche, P., Morelli, X.	2018	10.1021/acs.jmedchem.8b00653	0.95	ejYVJH@LHackhXDNmdP@cIIBhdeELdedemEELdmeK@lbjgo`XUjB@BBbijZYf`j@@@	CCn1cnc2c1C(=O)NC(=O)N2Cc3ccc(cc3)CNS(=O)(=O)c4ccc5c(c4)CCCC(=O)N5	DZH	6.548214	283
5Z5V	A	Chen, W., Zhang, H., Chen, Z., Jiang, H., Liao, L., Fan, S., Xing, J., Xie, Y., Chen, S., Ding, H., Chen, K., Jiang, H., Luo, C., Zheng, M., Yao, Z., Huang, Y., Zhang, Y.	2018	10.1038/s41389-018-0093-z	1.66	fj}H`@DT}dAdf^Uee~tRgArUj@@hHiP`@@	CC(=O)Nc1cc(c2cccc(c2n1)O)Cn3ccnc3	96X	6.542118	287
4PS5<NL>4OGJ	A	Ember, S.W., Zhu, J.Y., Olesen, S.H., Martin, M.P., Becker, A., Berndt, N., Georg, G.I., Schonbrunn, E.<NL>Ciceri, P., Muller, S., O'Mahony, A., Fedorov, O., Filippakopoulos, P., Hunt, J.P., Lasater, E.A., Pallares, G., Picaud, S., Wells, C., Martin, S., Wodicka, L.M., Shah, N.P., Treiber, D.K., Knapp, S.	2014	10.1021/cb500072z<NL>10.1038/nchembio.1471	1.4<NL>1.65	ejQVLH@LK@jf`XDK`@cIIBhiDkMheEJhdldeDcGLjmclRUjBhH`BJ@Bjj`H@@	Cc1cnc(nc1Nc2cccc(c2)S(=O)(=O)NC(C)(C)C)Nc3ccc(cc3)OCCN4CCCC4	2TA	6.537602	290		164 (BDB)<NL>164 (BMOAD_5693), 164 (BDB)
5CTL	A	Xue, X., Zhang, Y., Liu, Z., Song, M., Xing, Y., Xiang, Q., Wang, Z., Tu, Z., Zhou, Y., Ding, K., Xu, Y.	2016	10.1021/acs.jmedchem.5b01511	2.51	figQb@LY`ch@cIIBhhdhehbiem^\EM\eVh@@@@hf@`@@	CCN1c2ccc(c3c2c(ccc3)C1=O)NS(=O)(=O)c4ccccc4	EB9	6.522879	300
6CIS	A	Wang, J., Erazo, T., Ferguson, F.M., Buckley, D.L., Gomez, N., Munoz-Guardiola, P., Dieguez-Martinez, N., Deng, X., Hao, M., Massefski, W., Fedorov, O., Offei-Addo, N.K., Park, P.M., Dai, L., DiBona, A., Becht, K., Kim, N.D., McKeown, M.R., Roberts, J.M., Zhang, J., Sim, T., Alessi, D.R., Bradner, J.E., Lizcano, J.M., Blacklow, S.C., Qi, J., Xu, X., Gray, N.S.	2018	10.1021/acschembio.7b00638	1.51	e`vqL@@DEKGBlYWPEd\bbbbfbRRvfRQbbRtQfbRrbRpba`SdUSQswHmkkU@D@PUUAAESUUUUPQP@@	CC(C)Oc1cc(ccc1Nc2ncc3c(n2)N(c4ccccc4C(=O)N3C)C5CCCC5)C(=O)N6CCC(CC6)N7CCN(CC7)C	X26	6.522879	300
4WHW	A	Hett, E.C., Piatnitski Chekler, E.L., Basak, A., Bonin, P.D., Denny, R.A., Flick, A.C., Geoghegan, K.F., Liu, S., Pletcher, M.T., Robinson, R.P., Sahasrabudhe, P., Salter, S., Stock, I.A., Jones, L.H.	2015	10.1039/C5MD00070J	1.35	el^\L@@ODa`BDTfYU~UmUUYeUqIG@hdghPTViZh@ajj`hJIH`@@	COC1=CC(=CC=CC1=O)c2ccc3c(c2)nc(n3CCN4CCOCC4)CCc5ccccc5	3OT	6.464706	343
4X2I	A	Taylor, A.M., Vaswani, R.G., Gehling, V.S., Hewitt, M.C., Leblanc, Y., Audia, J.E., Bellon, S., Cummings, R.T., Cote, A., Harmange, J.C., Jayaram, H., Joshi, S., Lora, J.M., Mertz, J.A., Neiss, A., Pardo, E., Nasveschuk, C.G., Poy, F., Sandy, P., Setser, J.W., Sims, R.J., Tang, Y., Albrecht, B.K.	2016	10.1021/ml500411h	1.2	fnkHB@NVKTDPdrnsKKK}Qe`~rVl@EPTEPlQPL`@	Cc1nnc2n1-c3ccccc3N(C[C@H]2C)c4ccc(cc4)Cl	3X0	6.455932	350
6FT3	A	Jennings, L.E., Schiedel, M., Hewings, D.S., Picaud, S., Laurin, C.M.C., Bruno, P.A., Bluck, J.P., Scorah, A.R., See, L., Reynolds, J.K., Moroglu, M., Mistry, I.N., Hicks, A., Guzanov, P., Clayton, J., Evans, C.N.G., Stazi, G., Biggin, P.C., Mapp, A.K., Hammond, E.M., Humphreys, P.G., Filippakopoulos, P., Conway, S.J.	2018	10.1016/j.bmc.2018.05.003	1.28	flua`@H@M{IDhdXdhcMLDuZJZVh@bjhhNP@	Cc1c(c(on1)C)c2cc(cc(c2)O)[C@@H](C3CC3)O	E5T	6.42
4J0S	A	Hewings, D.S., Fedorov, O., Filippakopoulos, P., Martin, S., Picaud, S., Tumber, A., Wells, C., Olcina, M.M., Freeman, K., Gill, A., Ritchie, A.J., Sheppard, D.W., Russell, A.J., Hammond, E.M., Knapp, S., Brennan, P.E., Conway, S.J.	2013	10.1021/jm301588r	1.84	ffca`@H@M{IDhdXdhcMDe`fkEkRu@DU@AAAt@@	Cc1c(c(on1)C)c2cc(cc(c2)O)[C@H](c3ccccc3)O	1H3	6.417937	382		390 (BDB)
4J0R	A	Hewings, D.S., Fedorov, O., Filippakopoulos, P., Martin, S., Picaud, S., Tumber, A., Wells, C., Olcina, M.M., Freeman, K., Gill, A., Ritchie, A.J., Sheppard, D.W., Russell, A.J., Hammond, E.M., Knapp, S., Brennan, P.E., Conway, S.J.	2013	10.1021/jm301588r	1.72	ffca`@H@M{IDhdXdhcMDe`fkEkRu@DU@AAAr@@	Cc1c(c(on1)C)c2cc(cc(c2)O)[C@@H](c3ccccc3)O	1H2	6.413413	386		360 (BDB)
5ACY	A	Sullivan, J.M., Badimon, A., Schaefer, U., Ayata, P., Gray, J., Chung, C., Von Schimmelmann, M., Zhang, F., Garton, N., Smithers, N., Lewis, H., Tarakhovsky, A., Prinjha, R.K., Schaefer, A.	2015	10.1084/jem.20151271	2.01	edV\H@@DGC`LbbfbbbJrTTRRVvTRPfaecTprpLKUAQAT@@@UUTAHTKR@@	C[C@H]1C[C@H](c2cc(ccc2N1C(=O)C)c3ccc(cc3)CN4CCCCC4)Nc5ccccc5	9S3	6.400117	398		6.4 (BMOAD_5730)
5DX4	A	Xue, X., Zhang, Y., Liu, Z., Song, M., Xing, Y., Xiang, Q., Wang, Z., Tu, Z., Zhou, Y., Ding, K., Xu, Y.	2016	10.1021/acs.jmedchem.5b01511	2.3	fc PQ@EMEKRpXc@cHhdiiDTiheEeLmSb\uFwl@PmT@@EDpD@@	CCN1c2ccc(c3c2c(ccc3)C1=O)NS(=O)(=O)c4cc(ccc4OC)Br	E0C	6.387216	410		137 (BDB)
6CIY	A	Wang, J., Erazo, T., Ferguson, F.M., Buckley, D.L., Gomez, N., Munoz-Guardiola, P., Dieguez-Martinez, N., Deng, X., Hao, M., Massefski, W., Fedorov, O., Offei-Addo, N.K., Park, P.M., Dai, L., DiBona, A., Becht, K., Kim, N.D., McKeown, M.R., Roberts, J.M., Zhang, J., Sim, T., Alessi, D.R., Bradner, J.E., Lizcano, J.M., Blacklow, S.C., Qi, J., Xu, X., Gray, N.S.	2018	10.1021/acschembio.7b00638	1.68	ek\qL@@DEKGB`V]PIolbbbbfbRRvfVtTRQTtRVTRVDTLB\brjvnIiUuZh@`BBj``bZjjjjBJ@@@	CN1CCN(CC1)C2CCN(CC2)C(=O)c3ccc(c(c3)OC)Nc4ncc5c(n4)N(c6ccccc6C(=O)N5C)C7CCC7	F3J	6.387216	410
4ZW1	A	Liu, B., Zhang, S., Guo, M., Tian, M.			1.75	fa{pb@LJu[h@cIEEDdeDeiThdR`mJ]dmRsUSP@UU@@@	Cc1cc(cc(c1O)C)C2=Nc3c(c4c(s3)CN(CC4)C)C(=O)N2	4V1	6.37	430
5HM0	A	Albrecht, B.K., Gehling, V.S., Hewitt, M.C., Vaswani, R.G., Cote, A., Leblanc, Y., Nasveschuk, C.G., Bellon, S., Bergeron, L., Campbell, R., Cantone, N., Cooper, M.R., Cummings, R.T., Jayaram, H., Joshi, S., Mertz, J.A., Neiss, A., Normant, E., O'Meara, M., Pardo, E., Poy, F., Sandy, P., Supko, J., Sims, R.J., Harmange, J.C., Taylor, A.M., Audia, J.E.	2016	10.1021/acs.jmedchem.5b01882	1.39	ffsQB@AEbBHRYWYYYUvcKNCeIX@IhJBbaD@@	Cc1c-2c(on1)CN=C(c3c2cccc3)c4ccc(cc4)Cl	62V	6.356547	440
5CPE	A	Xue, X., Zhang, Y., Liu, Z., Song, M., Xing, Y., Xiang, Q., Wang, Z., Tu, Z., Zhou, Y., Ding, K., Xu, Y.	2016	10.1021/acs.jmedchem.5b01511	1.62	fewQb@LE``X@cIIBhhhdeEdeJl[tVirVjuAPE@UQLE@@@	CCN1c2ccc(c3c2c(ccc3)C1=O)S(=O)(=O)NC4CCCCCC4	EB2	6.346787	450
5CRZ	A	Xue, X., Zhang, Y., Liu, Z., Song, M., Xing, Y., Xiang, Q., Wang, Z., Tu, Z., Zhou, Y., Ding, K., Xu, Y.	2016	10.1021/acs.jmedchem.5b01511	2.12	fmoQc@IUxJXH``QjPrJJIRIDqQJKJYYbhiKvkXHEb`@@hf@`@@	CCN1c2ccc(c3c2c(ccc3)C1=O)NS(=O)(=O)c4ccc(cc4Cl)F	EB7	6.346787	450
5I88	A	Crawford, T.D., Tsui, V., Flynn, E.M., Wang, S., Taylor, A.M., Cote, A., Audia, J.E., Beresini, M.H., Burdick, D.J., Cummings, R., Dakin, L.A., Duplessis, M., Good, A.C., Hewitt, M.C., Huang, H.R., Jayaram, H., Kiefer, J.R., Jiang, Y., Murray, J., Nasveschuk, C.G., Pardo, E., Poy, F., Romero, F.A., Tang, Y., Wang, J., Xu, Z., Zawadzke, L.E., Zhu, X., Albrecht, B.K., Magnuson, S.R., Bellon, S., Co…	2016	10.1021/acs.jmedchem.6b00264	1.4	fi{p`@DLZBnQQQQIIHqIZZF\DkRRmUKUHPPuR@`Z@	C/C=C/CN1C=C(c2cc[nH]c2C1=O)c3cccc(c3)C(=O)N(C)C	69G	6.337242	460
6CZU	A	Kharenko, O.A., Patel, R.G., Brown, S.D., Calosing, C., White, A., Lakshminarasimhan, D., Suto, R.K., Duffy, B.C., Kitchen, D.B., McLure, K.G., Hansen, H.C., van der Horst, E.H., Young, P.R.	2018	10.1021/acs.jmedchem.8b00666	1.47	fakQ`@DI@EnQQQIYQQIQQ]QgOEBejehFBfJhhUP@	Cc1c(c(on1)C)C2=CN(C(=O)C=C2)Cc3ccc(cc3)[C@@H](C)O	FP7	6.318759	480
4BW3<NL>6DML	A	Mirguet, O., Lamotte, Y., Chung, C., Bamborough, P., Delannee, D., Bouillot, A., Gellibert, F., Krysa, G., Lewis, A., Witherington, J., Huet, P., Dudit, Y., Trottet, L., Nicodeme, E.<NL>van Zundert, G.C.P., Hudson, B.M., de Oliveira, S.H.P., Keedy, D.A., Fonseca, R., Heliou, A., Suresh, P., Borrelli, K., Day, T., Fraser, J.S., van den Bedem, H.	2014<NL>2018	10.1002/cmdc.201300259<NL>10.1021/acs.jmedchem.8b01292	1.5	ehRRB@@FAEO`DLklbfbbRfbRbTrdr|TTDt|JRjn~ZBB@@H`jijXB@@@	Cc1c(c(on1)C)c2cc3c(c(c(cn3)C(=O)O)Nc4ccccc4C(C)(C)C)nc2OC	9BM	6.30103<NL>NaN	500<NL>
6G0F	A	Humbeck, L., Pretzel, J., Spitzer, S., Koch, O.	2019	10.26434/chemrxiv.11472618.v1	1.62	fi{`Q@@nRWhLPTadTRTrfbTTRTZuFVCFl@ETEDMEQDNP@	COc1cc2c(c(c1OC)OC)[C@@H](CC(=O)N2)c3cc(ccc3F)Br	EGH	6.236572	580
5Y8Z	A	Zhang, M., Zhang, Y., Song, M., Xue, X., Wang, J., Wang, C., Zhang, C., Li, C., Xiang, Q., Zou, L., Wu, X., Wu, C., Dong, B., Xue, W., Zhou, Y., Chen, H., Wu, D., Ding, K., Xu, Y.	2018	10.1021/acs.jmedchem.8b00103	1.84	fakPQ@EMEKUPXc@cHhdiiDTihediSb\u[@DKU@PTpP@@	Cc1cc2c(cc1NS(=O)(=O)c3cc(ccc3OC)Br)c(no2)C	8Q3	6.207608	620
4BW4	A	Mirguet, O., Lamotte, Y., Chung, C., Bamborough, P., Delannee, D., Bouillot, A., Gellibert, F., Krysa, G., Lewis, A., Witherington, J., Huet, P., Dudit, Y., Trottet, L., Nicodeme, E.	2014	10.1002/cmdc.201300259	1.67	edVZBL@AODf`RGAg`IABPpdLbdJbbTVbebRfaVbbbegdQSWTspMUAAPp@@QSTqA@@@	Cc1c(c(on1)C)c2cc3c(c4c(cn3)NC(=O)N4c5ccccc5OC(F)(F)F)nc2OC	9B6	6.200659	630
5Z1T	A	Xiang, Q., Zhang, Y., Li, J., Xue, X., Wang, C., Song, M., Zhang, C., Wang, R., Li, C., Wu, C., Zhou, Y., Yang, X., Li, G., Ding, K., Xu, Y.	2018	10.1021/acsmedchemlett.8b00003	1.42	fmwPq@EUEKPRkAbLBLbbRfdQRfbrRRbiqNV}`BEj``JjdH@@	CC1(C(=O)Nc2cc(c(cc2O1)NS(=O)(=O)c3cc(ccc3OC)Br)O)C	EFN	6.2	630
4WIV	A	McKeown, M.R., Shaw, D.L., Fu, H., Liu, S., Xu, X., Marineau, J.J., Huang, Y., Zhang, X., Buckley, D.L., Kadam, A., Zhang, Z., Blacklow, S.C., Qi, J., Zhang, W., Bradner, J.E.	2014	10.1021/jm501120z	1.56	fmoi@@HNbehLdRbQbRrbTRRRdpSQ`q[vej@BejiZhh@@	Cc1c(c(on1)C)c2ccc(cc2)c3c(n4ccncc4n3)NC(C)(C)C	3P2	6.195861	637		550 (BDB), 550 (BMOAD_5627)
5Z1S	A	Xiang, Q., Zhang, Y., Li, J., Xue, X., Wang, C., Song, M., Zhang, C., Wang, R., Li, C., Wu, C., Zhou, Y., Yang, X., Li, G., Ding, K., Xu, Y.	2018	10.1021/acsmedchemlett.8b00003	1.42	fcoPq@EMEKPZ{AbLBLbbRfdQRfbRVRTUNIKt\@PmTDDUUHP@@	CC1(C(=O)Nc2cc(c(cc2O1)NS(=O)(=O)c3cc(ccc3OC)Br)OC)C	EFM	6.16
5CY9	A	Xue, X., Zhang, Y., Liu, Z., Song, M., Xing, Y., Xiang, Q., Wang, Z., Tu, Z., Zhou, Y., Ding, K., Xu, Y.	2016	10.1021/acs.jmedchem.5b01511	1.55	fnsQb@LQ`bh@cIIBeDhdhbiecNCfJUj``HBbXH@@	CCCCS(=O)(=O)Nc1ccc2c3c1cccc3C(=O)N2CC	E0A	6.136677	730		218 (BDB)
3P5O	A	Nicodeme, E., Jeffrey, K.L., Schaefer, U., Beinke, S., Dewell, S., Chung, C., Chandwani, R., Marazzi, I., Wilson, P., Coste, H., White, J., Kirilovsky, J., Rice, C.M., Lora, J.M., Prinjha, R.K., Lee, K., Tarakhovsky, A.	2010	10.1038/nature09589	1.6	eghZDH@AODnifa`HcHhdlheEEDdddhlSPqYyETUu@AMATCQSUQC@h`@	CCNC(=O)C[C@H]1c2nnc(n2-c3ccc(cc3C(=N1)c4ccc(cc4)Cl)OC)C	EAM	6.130768	740	32-39 (BDB)	50.5 (BMOAD_5628), 50.5 (PDBbind), 48-99 (BDB)
6CD5	A	Wang, J., Erazo, T., Ferguson, F.M., Buckley, D.L., Gomez, N., Munoz-Guardiola, P., Dieguez-Martinez, N., Deng, X., Hao, M., Massefski, W., Fedorov, O., Offei-Addo, N.K., Park, P.M., Dai, L., DiBona, A., Becht, K., Kim, N.D., McKeown, M.R., Roberts, J.M., Zhang, J., Sim, T., Alessi, D.R., Bradner, J.E., Lizcano, J.M., Blacklow, S.C., Qi, J., Xu, X., Gray, N.S.	2018	10.1021/acschembio.7b00638	1.58	egRqL@@DEKGBh^SPE`\bbbbfbRRvfRQbbRJfbRrbRpba`SdUSQsuKNikU@D@PUUAADuUUUTDT@@@	CN1CCN(CC1)C2CCN(CC2)C(=O)c3ccc(c(c3)OC)Nc4ncc5c(n4)N(c6ccccc6C(=O)N5C)C7CCCC7	R4L	6.119186	760
4HXM	A	Zhao, L., Cao, D., Chen, T., Wang, Y., Miao, Z., Xu, Y., Chen, W., Wang, X., Li, Y., Du, Z., Xiong, B., Li, J., Xu, C., Zhang, N., He, J., Shen, J.	2013	10.1021/jm301793a	1.5	fmwpS@LNSAAY`BFAGPcIIBhhddXehheeeZmyoUjdJBJejfR@@	CCCC(=O)Nc1cc(cc(c1)NS(=O)(=O)c2cccs2)C3=CSC(=O)N3	1A8	6.102373	790
4Z1S	A	Taylor, A.M., Vaswani, R.G., Gehling, V.S., Hewitt, M.C., Leblanc, Y., Audia, J.E., Bellon, S., Cummings, R.T., Cote, A., Harmange, J.C., Jayaram, H., Joshi, S., Lora, J.M., Mertz, J.A., Neiss, A., Pardo, E., Nasveschuk, C.G., Poy, F., Sandy, P., Setser, J.W., Sims, R.J., Tang, Y., Albrecht, B.K.	2016	10.1021/ml500411h	1.06	egdV@H@NKJfek`HcHhdlhheDhdeiiTmPqXEyeTul]@ATEATRp@QDPFP@	Cc1nnc2n1-c3ccc(cc3N(C[C@@H]2C)c4ccc(cc4)Cl)c5ccc(nc5)N	559	6.102373	790
5VOM	A	Millan, D.S., Kayser-Bricker, K.J., Martin, M.W., Talbot, A.C., Schiller, S.E.R., Herbertz, T., Williams, G.L., Luke, G.P., Hubbs, S., Alvarez Morales, M.A., Cardillo, D., Troccolo, P., Mendes, R.L., McKinnon, C.	2017	10.1021/acsmedchemlett.7b00191	1.67	eod\B@@DOL`BamdfVununVWeeDT\BrZn^Z`B@BJfjYjBXFh@@	C[C@H]1CN(c2cc(ccc2N1C(=O)C)c3cccc(c3)C(=O)NC)C(=O)c4ccco4	9GY	6.102373	790
5WUU	A	Sun, Z., Zhang, H., Chen, Z., Xie, Y., Jiang, H., Chen, L., Ding, H., Zhang, Y., Jiang, H., Zheng, M., Luo, C.	2017	10.1016/j.bmcl.2017.03.012	1.72	fakQb@NFYeh@cIEDiXldhheDlRb\u{TkUURE@e@@@	CN(CCCNC1=CC(=O)Oc2c1cccc2)C(=O)c3cccs3	7UU	6.091515	810
5Y1Y	A	Jiang, H., Xing, J., Wang, C., Zhang, H., Yue, L., Wan, X., Chen, W., Ding, H., Xie, Y., Tao, H., Chen, Z., Jiang, H., Chen, K., Chen, S., Zheng, M., Zhang, Y., Luo, C.	2017	10.1039/c7ob02369c	1.91	dg}LAHdDnISdfyegQWSZ@@@`@@	c1cc2c(ccc(c2nc1)O)[N+](=O)[O-]	HNQ	6.008774	980
4O72	A	Ember, S.W., Zhu, J.Y., Olesen, S.H., Martin, M.P., Becker, A., Berndt, N., Georg, G.I., Schonbrunn, E.	2014	10.1021/cb500072z	1.4	eglXLH@F`ak`@cIEEEDdhmhbihmBdQQHyixeTUt]]PA@@AAQKUTAP@@	c1ccc2c(c1)c3cccc(c3s2)c4cccc5c4OC(=CC5=O)N6CCOCC6	2R4	6	1000
5WA5<NL>5VBO	A	Wang, J., Erazo, T., Ferguson, F.M., Buckley, D.L., Gomez, N., Munoz-Guardiola, P., Dieguez-Martinez, N., Deng, X., Hao, M., Massefski, W., Fedorov, O., Offei-Addo, N.K., Park, P.M., Dai, L., DiBona, A., Becht, K., Kim, N.D., McKeown, M.R., Roberts, J.M., Zhang, J., Sim, T., Alessi, D.R., Bradner, J.E., Lizcano, J.M., Blacklow, S.C., Qi, J., Xu, X., Gray, N.S.<NL>EMBER, S.W., BERNDT, N., ZHU, J.-…	2018<NL>	10.1021/acschembio.7b00638<NL>	1.17<NL>1.3	ee_QL@@DEKGDklQPFclbbbbfbRRuRbbRJfbRrbRpba`SdPrtJOHkU@D@PTDDSUUUUPE@@@	CN1CCN(CC1)C2CCN(CC2)C(=O)c3ccc(c(c3)OC)Nc4ncc5c(n4)N(c6ccccc6C(=O)N5C)C	4K4	5.982967<NL>NaN	1040<NL>
5CRM	A	Xue, X., Zhang, Y., Liu, Z., Song, M., Xing, Y., Xiang, Q., Wang, Z., Tu, Z., Zhou, Y., Ding, K., Xu, Y.	2016	10.1021/acs.jmedchem.5b01511	1.99	fj}Qb@L^`cH@cIIBheEhliemF]GpUjB@@hfB@@	CCNS(=O)(=O)c1ccc2c3c1cccc3C(=O)N2CC	EB5	5.962574	1090
4GPJ	A	Hay, D., Fedorov, O., Filippakopoulos, P., Picaud, S., Martin, S., Philpott, M., Hewings, D., Uttakar, S., Heightman, T.D., Conway, S., Knapp, S., Brennan, P.	2013	10.1039/c2md20189e	1.6	fnk``@H@}dbTRLRTrdLrVBZLzMVtmP@UT@DQBr@@	Cc1c(c(on1)C)c2ccc3c(c2)[C@@](CC3)(c4ccccc4)O	0Q1	5.9
4BW1	A	Mirguet, O., Lamotte, Y., Chung, C., Bamborough, P., Delannee, D., Bouillot, A., Gellibert, F., Krysa, G., Lewis, A., Witherington, J., Huet, P., Dudit, Y., Trottet, L., Nicodeme, E.	2014	10.1002/cmdc.201300259	1.4	eod\L@@FAK`DMlbfbbRfbRbVTf\TTDT|rRJvnZBB@@HBjZf@`@@	Cc1c(c(on1)C)c2ccc3c(c2)ncc(c3Nc4ccccc4C(C)(C)C)C(=O)O	S5B	5.899629	1260
6MH7	A	Divakaran, A., Talluri, S.K., Ayoub, A.M., Mishra, N.K., Cui, H., Widen, J.C., Berndt, N., Zhu, J.Y., Carlson, A.S., Topczewski, J.J., Schonbrunn, E.K., Harki, D.A., Pomerantz, W.C.K.	2018	10.1021/acs.jmedchem.8b01248	1.74	ehZV@H@AMGFna`ICHhdlheLhhddichdijFEMLfjakgh@JVhJBbh@JH`@@	Cc1ccc(cc1C)Nc2nccc(n2)c3c(ncn3C4CCNCC4)c5ccc(cc5)F	JQY	5.886057	1300
5A5S	A	Demont, E.H., Chung, C., Furze, R.C., Grandi, P., Michon, A., Wellaway, C., Barrett, N., Bridges, A.M., Craggs, P.D., Diallo, H., Dixon, D.P., Douault, C., Emmons, A.J., Jones, E.J., Karamshi, B.V., Locke, K., Mitchell, D.J., Mouzon, B.H., Prinjha, R.K., Roberts, A.D., Sheppard, R.J., Watson, R.J., Bamborough, P.	2015	10.1021/acs.jmedchem.5b00772	1.36	fmoh`@DRUWhIyEDhhXdehhddlcPVcEzt[TpDETEAEQ@@@	CC1=Cc2c(cnc(c2NC1=O)NC3CCNCC3)c4cc(cnc4)OC	NP8	5.886057	1300
4QR3	A	Zhao, L., Wang, Y., Cao, D.Y., Chen, T.T., Wang, Q., Li, Y., Xu, Y.C., Zhang, N., Wang, X., Chen, D., Chen, L., Chen, Y.L., Xia, G., Shi, Z., Liu, Y.C., Lin, Y., Miao, Z., Shen, J., Xiong, B.	2015	10.1021/jm501504k	1.37	fj}Qa@LA``h@cHQddaTTRRTlrVoFlgJuAPUDte@@@	c1cc(cc(c1)S(=O)(=O)NC2CCCC2)C3=CSC(=O)N3	BNJ	5.853872	1400
5CP5	A	Xue, X., Zhang, Y., Liu, Z., Song, M., Xing, Y., Xiang, Q., Wang, Z., Tu, Z., Zhou, Y., Ding, K., Xu, Y.	2016	10.1021/acs.jmedchem.5b01511	1.79	fewQa@LY``X@aladdaTTTRRbvTrQMyrXurUZ`@@@Bbf@`@@	CCN1c2ccc(c3c2c(ccc3)C1=O)S(=O)(=O)Nc4ccc(cc4)F	EB0	5.815309	1530		1234 (BDB), 1234 (BMOAD_5708)
6MH1	A	Divakaran, A., Talluri, S.K., Ayoub, A.M., Mishra, N.K., Cui, H., Widen, J.C., Berndt, N., Zhu, J.Y., Carlson, A.S., Topczewski, J.J., Schonbrunn, E.K., Harki, D.A., Pomerantz, W.C.K.	2018	10.1021/acs.jmedchem.8b01248	1.6	ehZV@H@AMGFna`ICHhdlheLhhddichdhjFEMLfjakgh@JVhJBbh@JH`@@	Cc1cc(cc(c1)Nc2nccc(n2)c3c(ncn3C4CCNCC4)c5ccc(cc5)F)C	JQP	5.769551	1700
4HBX	A	Fish, P.V., Filippakopoulos, P., Bish, G., Brennan, P.E., Bunnage, M.E., Cook, A.S., Federov, O., Gerstenberger, B.S., Jones, H., Knapp, S., Marsden, B., Nocka, K., Owen, D.R., Philpott, M., Picaud, S., Primiano, M.J., Ralph, M.J., Sciammetta, N., Trzupek, J.D.	2012	10.1021/jm3010515	1.62	fbmqb@L^CAFPAFRRFJIIFYIJRcVCEZhJ@jib@@	CN1Cc2cc(ccc2NC1=O)S(=O)(=O)N3CCCC3	14X	5.721246	1900
5Z90	A	Xiao, S., Chen, S., Chen, H.			1.8	fnkQb@LQ`bh@cIICEDeDXlieiJlxNXiVjB`@JIhH@@	CCN1c2ccc(c3c2c(ccc3)C1=O)S(=O)(=O)N4CCCC4	99U	5.72	1910
5Z1R	A	Xiang, Q., Zhang, Y., Li, J., Xue, X., Wang, C., Song, M., Zhang, C., Wang, R., Li, C., Wu, C., Zhou, Y., Yang, X., Li, G., Ding, K., Xu, Y.	2018	10.1021/acsmedchemlett.8b00003	1.62	fegQQ@EUEKRY`qFAFQQISRHiSISIRZgHyjv@HVj@HjiB@@	CC1(C(=O)Nc2ccc(cc2O1)NS(=O)(=O)c3cc(ccc3OC)Br)C	EFL	5.7
5M3A	A	Geist, L., Mayer, M., Cockcroft, X.L., Wolkerstorfer, B., Kessler, D., Engelhardt, H., McConnell, D.B., Konrat, R.	2017	10.1021/acs.jmedchem.7b00845	1.65	fnkY@@JR\DmPYHhhdhhkBeLhJtcQRVmAHUPttlM@@@	Cc1nnc2n1nc(cc2)c3cnn(c3Oc4ccccc4)C	7.00E+07	5.699622	1997
4HXL	A	Zhao, L., Cao, D., Chen, T., Wang, Y., Miao, Z., Xu, Y., Chen, W., Wang, X., Li, Y., Du, Z., Xiong, B., Li, J., Xu, C., Zhang, N., He, J., Shen, J.	2013	10.1021/jm301793a	1.52	e`\\BL@LGDhDBi`@a`HzBLddJbbRQbVbbVVtRRfegcWSwruREAERuSUTe@@@	c1cc(sc1)S(=O)(=O)Nc2cc(cc(c2)NC(=O)CCC3CCCCC3)C4=CSC(=O)N4	1A9	5.657577	2200
5Y93	A	Zhang, M., Zhang, Y., Song, M., Xue, X., Wang, J., Wang, C., Zhang, C., Li, C., Xiang, Q., Zou, L., Wu, X., Wu, C., Dong, B., Xue, W., Zhou, Y., Chen, H., Wu, D., Ding, K., Xu, Y.	2018	10.1021/acs.jmedchem.8b00103	1.62	eb^RND@EAmgaIM@nelPLQ`HrJIJZQEJZIIIJJMIQIT\IE]CHxpABuPPQTsUUTE@@@	Cc1c2cc(c(cc2on1)OCC(=O)NCCN3CCOCC3)NS(=O)(=O)c4cc(ccc4OC)Br	8Q9	5.643974	2270
5CS8	A	Xue, X., Zhang, Y., Liu, Z., Song, M., Xing, Y., Xiang, Q., Wang, Z., Tu, Z., Zhou, Y., Ding, K., Xu, Y.	2016	10.1021/acs.jmedchem.5b01511	1.62	ek`TJH@LNhD@hm`@cIIBhhheDhmD\hUcDoLjinaej@H@F@JbXB@@@	CCN1c2ccc(c3c2c(ccc3)C1=O)NS(=O)(=O)c4ccccc4C(=O)OC	EB8	5.640165	2290
5CFW<NL>6DMJ	A	Chekler, E.L., Pellegrino, J.A., Lanz, T.A., Denny, R.A., Flick, A.C., Coe, J., Langille, J., Basak, A., Liu, S., Stock, I.A., Sahasrabudhe, P., Bonin, P.D., Lee, K., Pletcher, M.T., Jones, L.H.<NL>van Zundert, G.C.P., Hudson, B.M., de Oliveira, S.H.P., Keedy, D.A., Fonseca, R., Heliou, A., Suresh, P., Borrelli, K., Day, T., Fraser, J.S., van den Bedem, H.	2015<NL>2018	10.1016/j.chembiol.2015.10.013<NL>10.1021/acs.jmedchem.8b01292	1.15	edVRL@@JAKK`M`\dRVRTTTRrrTTRTTWQEFe`RRwvuuUUTCAE@pTqUA@@@	Cc1c(c(on1)C)c2ccc3c(c2)nc(n3CCN4CCOCC4)CCc5ccc(cc5)OC	53W	5.619789<NL>5.62	2400		780 (BDB), 780 (BMOAD_5757)<NL>
4O77	A	Ember, S.W., Zhu, J.Y., Olesen, S.H., Martin, M.P., Becker, A., Berndt, N., Georg, G.I., Schonbrunn, E.	2014	10.1021/cb500072z	2	figqB@AZZLDadTRVTRbtTRRVMFJuem^p@TmP@@AD@@@	c1cc(ccc1c2[nH]c(c(n2)c3ccc(cc3)F)c4ccncc4)O	2RE	5.60206	2500		3400 (BDB)
4UIY	A	Theodoulou, N.H., Bamborough, P., Bannister, A.J., Becher, I., Bit, R.A., Che, K.H., Chung, C., Dittmann, A., Drewes, G., Drewry, D.H., Gordon, L., Grandi, P., Leveridge, M., Lindon, M., Michon, A., Molnar, J., Robson, S.C., Tomkinson, N.C.O., Kouzarides, T., Prinjha, R.K., Humphreys, P.G.	2016	10.1021/acs.jmedchem.5b00256	1.3	e`\\LJ@AEJhDB`@`pHndGiCzPrRPiYJZIIJJJEKPrL\N^YUK[KUUMMUKA@UTp@@@	CN1C=C(c2c(cc(s2)C(=N)NC3CCS(=O)(=O)CC3)C1=O)c4cccc(c4)C(F)(F)F	5V2	5.59998	2512
5COI	A	Xue, X., Zhang, Y., Liu, Z., Song, M., Xing, Y., Xiang, Q., Wang, Z., Tu, Z., Zhou, Y., Ding, K., Xu, Y.	2016	10.1021/acs.jmedchem.5b01511	1.62	fc QR@LM`aNU`BLddJbTRdTVbRTzvoQFVk^kTDAT@uTSAP@@	CCN1c2ccc(c3c2c(ccc3)C1=O)S(=O)(=O)NCC4(CCCC4)C(=O)O	55K	5.58838	2580
5EIS	A	Raux, B., Voitovich, Y., Derviaux, C., Lugari, A., Rebuffet, E., Milhas, S., Priet, S., Roux, T., Trinquet, E., Guillemot, J.C., Knapp, S., Brunel, J.M., Fedorov, A.Y., Collette, Y., Roche, P., Betzi, S., Combes, S., Morelli, X.	2016	10.1021/acs.jmedchem.5b01708	1.6	fj}Hb@AFmGRPQBSJzsMj QcoAc@AUMLsQP@@	CCn1cnc2c1C(=O)NC(=O)N2Cc3ccc(cc3)Cl	5OU	5.585027	2600		1800 (BDB)
5D0C	A	Xue, X., Zhang, Y., Liu, Z., Song, M., Xing, Y., Xiang, Q., Wang, Z., Tu, Z., Zhou, Y., Ding, K., Xu, Y.	2016	10.1021/acs.jmedchem.5b01511	1.49	ek`\BH@LLfhDAm`@cIIBheDhhldillmMG@jdflbejB@hBjJZXJ@@@	CCN1c2ccc(c3c2c(ccc3)C1=O)S(=O)(=O)NCC4CCN(CC4)C(=O)C	E0B	5.497573	3180		2340 (BDB)
5A85	A	Bamborough, P., Chung, C., Furze, R.C., Grandi, P., Michon, A., Sheppard, R.J., Barnett, H., Diallo, H., Dixon, D.P., Douault, C., Jones, E.J., Karamshi, B., Mitchell, D.J., Prinjha, R.K., Rau, C., Watson, R.J., Werner, T., Demont, E.H.	2015	10.1021/acs.jmedchem.5b00773	1.72	fmoH`@DRTT@\bbTTLRQbbRvbRhKQdefmjXBBjjjjhiEhy@@	CC1=Cc2ccnc(c2NC1=O)N[C@@H]3CCNC[C@H]3OCC4CCCCC4	78J	5.400117	3980
4NR8	A	Filippakopoulos, P., Hay, D., von Delft, F., Edwards, A.M., Picaud, S., Fedorov, O., Brennan, P., Bountra, C.			1.63	e`RRD@@JAKK`MdiWUfY]ufUfRJMK@deomkjjjhFBJA`ib``@@	Cc1c(c(on1)C)c2ccc3c(c2)nc(n3CCN4CCOCC4)CCc5ccccc5	2LL	5.39	4100
4HXS	A	Zhao, L., Cao, D., Chen, T., Wang, Y., Miao, Z., Xu, Y., Chen, W., Wang, X., Li, Y., Du, Z., Xiong, B., Li, J., Xu, C., Zhang, N., He, J., Shen, J.	2013	10.1021/jm301793a	1.43	fnsQa@LI`ah@bhQddaRbbRRftJQ`nbVjuP@@PSRD@@	c1ccc(cc1)CS(=O)(=O)Nc2cccc(c2)C3=CSC(=O)N3	1A3	5.387216	4100
4HXR	A	Zhao, L., Cao, D., Chen, T., Wang, Y., Miao, Z., Xu, Y., Chen, W., Wang, X., Li, Y., Du, Z., Xiong, B., Li, J., Xu, C., Zhang, N., He, J., Shen, J.	2013	10.1021/jm301793a	1.53	fj}Qc@LA``h@a`QdHrRPjJIIFZYIVk^SeZiB`bZT`@@	c1cc(cc(c1)NS(=O)(=O)c2cccs2)C3=CSC(=O)N3	1A4	5.387216	4100
4HBY	A	Fish, P.V., Filippakopoulos, P., Bish, G., Brennan, P.E., Bunnage, M.E., Cook, A.S., Federov, O., Gerstenberger, B.S., Jones, H., Knapp, S., Marsden, B., Nocka, K., Owen, D.R., Philpott, M., Picaud, S., Primiano, M.J., Ralph, M.J., Sciammetta, N., Trzupek, J.D.	2012	10.1021/jm3010515	1.59	ffcqb@LQSAEPAFRREQQIISYYKSkASeZ`@@HjdH@@	CN1Cc2cc(ccc2NC1=O)S(=O)(=O)Nc3ccccc3	13F	5.356547	4400
4O78	A	Ember, S.W., Zhu, J.Y., Olesen, S.H., Martin, M.P., Becker, A., Berndt, N., Georg, G.I., Schonbrunn, E.	2014	10.1021/cb500072z	1.34	eghVL@@CGODim`JNLdTtTRQrbRftRTrpbdVPrvquADQT@Q@DU@H@@	Cc1c2ccc(cc2[nH]n1)Nc3ccnc(n3)Nc4cc(c(c(c4)OC)OC)OC	SAV	5.337242	4600
4MEP	A	Vidler, L.R., Filippakopoulos, P., Fedorov, O., Picaud, S., Martin, S., Tomsett, M., Woodward, H., Brown, N., Knapp, S., Hoelder, S.	2013	10.1021/jm4011302	1.85	fewiB@JRT[q@QFQQQYZIQZJIQIEgMFJOlzVjZj@@`AP@@	Cc1cccnc1n2c(nc(n2)c3ccccc3)C4=CNC(=O)C(=C4)Cl	24Y	5.327902	4700
4HBW	A	Fish, P.V., Filippakopoulos, P., Bish, G., Brennan, P.E., Bunnage, M.E., Cook, A.S., Federov, O., Gerstenberger, B.S., Jones, H., Knapp, S., Marsden, B., Nocka, K., Owen, D.R., Philpott, M., Picaud, S., Primiano, M.J., Ralph, M.J., Sciammetta, N., Trzupek, J.D.	2012	10.1021/jm3010515	1.69	fdyqb@LV]ADPAFRREQIZYIIVg^VhHBjd`@@	CCNS(=O)(=O)c1ccc2c(c1)CN(C(=O)N2)C	14Z	5.318759	4800
3SVG	A	Filippakopoulos, P., Picaud, S., Felletar, I., Hewings, S.D., von Delft, F., Arrowsmith, C.H., Edwards, A.M., Weigelt, J., Bountra, C., Conway, S.J., Knapp, S.			1.68	flea`@H@LGIDhdXdhehlDuZej@HjjHNP@	CCOc1cc(cc(c1)[C@@H](C)O)c2c(noc2C)C	ODR	5.318759	4800
5EGU	A	Raux, B., Voitovich, Y., Derviaux, C., Lugari, A., Rebuffet, E., Milhas, S., Priet, S., Roux, T., Trinquet, E., Guillemot, J.C., Knapp, S., Brunel, J.M., Fedorov, A.Y., Collette, Y., Roche, P., Betzi, S., Combes, S., Morelli, X.	2016	10.1021/acs.jmedchem.5b01708	2.21	edZQDH@LBFAIMDeic`@cIEDdhdeEDdeeEMd\dqpYYyEtmSTmUSMUTtuUM@@@	CCCCc1c(nc2nc(nn2c1C)SCc3nc4c(n3CC)C(=O)NC(=O)N4CCCC)C	5NQ	5.30103	5000		1400 (BDB)
5VZS	A	Murray, J.M.	2017	10.1021/acs.jmedchem.7b00796	1.71	ef]^DD@CKGBfmlTRPIABPrJZJIQIIJYJUQIJIIZHbZVNQYM][OPduAAIMUSSUUUMQUP@@	CNC(=O)N1CCc2c(c(nn2C3CCOCC3)N4CCCc5c4cc(c(c5)c6cnn(c6)C)C(F)F)C1	9U4	5.29	5100
6CD4	A	Wang, J., Erazo, T., Ferguson, F.M., Buckley, D.L., Gomez, N., Munoz-Guardiola, P., Dieguez-Martinez, N., Deng, X., Hao, M., Massefski, W., Fedorov, O., Offei-Addo, N.K., Park, P.M., Dai, L., DiBona, A., Becht, K., Kim, N.D., McKeown, M.R., Roberts, J.M., Zhang, J., Sim, T., Alessi, D.R., Bradner, J.E., Lizcano, J.M., Blacklow, S.C., Qi, J., Xu, X., Gray, N.S.	2018	10.1021/acschembio.7b00638	1.23	ecXqL@@DEKGBojUPAglbbbbfbRRvfJbbRJfbRrbRpba`SdRqvILjkU@D@PUPPQMUUUU@T@@@	CC(C)N1c2ccccc2C(=O)N(c3c1nc(nc3)Nc4ccc(cc4OC)C(=O)N5CCC(CC5)N6CCN(CC6)C)C	EX1	5.289037	5140
5KU3	A	Crawford, T.D., Romero, F.A., Lai, K.W., Tsui, V., Taylor, A.M., de Leon Boenig, G., Noland, C.L., Murray, J., Ly, J., Choo, E.F., Hunsaker, T.L., Chan, E.W., Merchant, M., Kharbanda, S., Gascoigne, K.E., Kaufman, S., Beresini, M.H., Liao, J., Liu, W., Chen, K.X., Chen, Z., Conery, A.R., Cote, A., Jayaram, H., Jiang, Y., Kiefer, J.R., Kleinheinz, T., Li, Y., Maher, J., Pardo, E., Poy, F., Spillan…	2016	10.1021/acs.jmedchem.6b01022	1.14	eolVDH@BEGHdjmk`IAIfUVyYU]ewfAGOHdjimchHHffYjjjibj`rP@	CC(=O)N1CCc2c(c(nn2[C@H]3CCOC3)Nc4ccc(cc4F)c5cnn(c5)C)C1	6XH	5.260428	5490
6G0E	A	Humbeck, L., Pretzel, J., Spitzer, S., Koch, O.	2019	10.26434/chemrxiv.11472618.v1	1.61	ek`\DHHEMFiG@@aj\dTRbTTRtRJVJbRDtlRJZvNjXIhFhjjjhh@@	CCN1c2ccccc2C(=CC1=O)SCC(=O)N3CC[NH+](CC3)C4CCCCC4	EGN	5.250264	5620
4O7E	A	Ember, S.W., Zhu, J.Y., Olesen, S.H., Martin, M.P., Becker, A., Berndt, N., Georg, G.I., Schonbrunn, E.	2014	10.1021/cb500072z	1.85	fa{q@@AZZAIe[mgfUWiqVlmkv@Hfj@@@A@@@	c1ccc(cc1)c2[nH]c(c(n2)c3ccncc3)c4cccc(c4)O	2RN	5.244125	5700
5BT4	A	Tallant, C., Hay, D., Krojer, T., Nunez-Alonso, G., Picaud, S., Newman, J.A., Fedorov, O., von Delft, F., Arrowsmith, C.H., Edwards, A.M., Bountra, C., Brennan, P.E., Knapp, S.			1.5	ebQRLH@CKFhROlPHcHhhddTheDddhmMDeEDpHyxUT}c}CAAESUAAUSUSPEPYP@	Cc1c(c(on1)C)c2ccc3c(c2)nc(n3C[C@H](C)N4CCOCC4)CCc5ccc(c(c5)Cl)OC	2LO	5.232844	5850		850 (BDB)
5LJ1	A	Bamborough, P., Chung, C.W., Demont, E.H., Furze, R.C., Bannister, A.J., Che, K.H., Diallo, H., Douault, C., Grandi, P., Kouzarides, T., Michon, A.M., Mitchell, D.J., Prinjha, R.K., Rau, C., Robson, S., Sheppard, R.J., Upton, R., Watson, R.J.	2016	10.1002/anie.201603928	1.9	efUZLD@KOLndYHk`IABPRZuuYe[g[U[m]Xx|RFfv^qIjjjjjjBHJfB@jDpTfb\`@	Cc1cc(cnc1)c2cnc(c3c2C=C(C(=O)N3)C)N[C@@H]4[C@H](CNC[C@H]4OCC5CCC(CC5)(F)F)OC	6XX	5.200659	6300
6CJ1	A	Wang, J., Erazo, T., Ferguson, F.M., Buckley, D.L., Gomez, N., Munoz-Guardiola, P., Dieguez-Martinez, N., Deng, X., Hao, M., Massefski, W., Fedorov, O., Offei-Addo, N.K., Park, P.M., Dai, L., DiBona, A., Becht, K., Kim, N.D., McKeown, M.R., Roberts, J.M., Zhang, J., Sim, T., Alessi, D.R., Bradner, J.E., Lizcano, J.M., Blacklow, S.C., Qi, J., Xu, X., Gray, N.S.	2018	10.1021/acschembio.7b00638	1.53	ekTqL@@DEKGB`V]PIolbbbbfbRRvfVtTRQTtRVTRVDTLB\bvnIiUuZh@`BBj``bZjjjj@jCq@@	CC[C@H](C)N1c2ccccc2C(=O)N(c3c1nc(nc3)Nc4ccc(cc4OC)C(=O)N5CCC(CC5)N6CCN(CC6)C)C	FND	5.199971	6310
4BW2	A	Mirguet, O., Lamotte, Y., Chung, C., Bamborough, P., Delannee, D., Bouillot, A., Gellibert, F., Krysa, G., Lewis, A., Witherington, J., Huet, P., Dudit, Y., Trottet, L., Nicodeme, E.	2014	10.1002/cmdc.201300259	1.92	eodRL@@FAGK`DMlbfbbRfbRbVTf\TTDT|rRJvnZBB@@HBjZf@`@@	Cc1c(c(on1)C)c2ccc3c(c(cnc3n2)C(=O)O)Nc4ccccc4C(C)(C)C	UTH	5.199971	6310
5H21	A	Chen, Z., Zhang, H., Liu, S., Xie, Y., Jiang, H., Lu, W., Xu, H., Yue, L., Zhang, Y., Ding, H., Zheng, M., Yu, K., Chen, K., Jiang, H., Luo, C.	2017	10.1039/c7md00083a	1.59	ff}`R@NR}GH@aJY}[eYU|T\FfZf@Hjj@@@	COc1cc(cc(c1OC)OC)C(=O)NCCc2cccs2	RMR	5.19382	6400
4PCE	A	Zhao, H., Gartenmann, L., Dong, J., Spiliotopoulos, D., Caflisch, A.	2014	10.1016/j.bmcl.2014.04.017	1.29	flua@@N@RYegu[U`nRbeijfj@B`@@	CCc1cc2c(n1Cc3ccccc3)CCCC2=O	2N0	5.154902	7000
4PCI	A	Zhao, H., Gartenmann, L., Dong, J., Spiliotopoulos, D., Caflisch, A.	2014	10.1016/j.bmcl.2014.04.017	1.25	fluQ@@DR@dsK\oN IF}EKUPT@@DDFH@	CN1c2ccccc2N[C@@H](CC1=O)c3ccccc3	2NJ	5.124939	7500
4MR4<NL>4J3I	A	Picaud, S., Wells, C., Felletar, I., Brotherton, D., Martin, S., Savitsky, P., Diez-Dacal, B., Philpott, M., Bountra, C., Lingard, H., Fedorov, O., Muller, S., Brennan, P.E., Knapp, S., Filippakopoulos, P.<NL>McLure, K.G., Gesner, E.M., Tsujikawa, L., Kharenko, O.A., Attwell, S., Campeau, E., Wasiak, S., Stein, A., White, A., Fontano, E., Suto, R.K., Wong, N.C., Wagner, G.S., Hansen, H.C., Young,…	2013	10.1073/pnas.1310658110<NL>10.1371/journal.pone.0083190	1.66<NL>1.24	fmwQP@D\AIOUyEDhhhmDllhdjdsfoQru@t@PDUUT@@@	Cc1cc(cc(c1OCCO)C)C2=Nc3cc(cc(c3C(=O)N2)OC)OC	1K0	5.05	8930		1142 (PDBbind), 135-8930 (BDB)<NL>135-8930 (BDB), 8930 (BMOAD_5642)
4CFL	A	Dittmann, A., Werner, T., Chung, C., Savitski, M.M., Falth Savitski, M., Grandi, P., Hopf, C., Lindon, M., Neubauer, G., Prinjha, R.K., Bantscheff, M., Drewes, G.	2014	10.1021/cb400789e	1.32	fnkP`@EUAqIfVWn[U]gIFSTkV`XJJB`bH@@	c1ccc(cc1)c2cccc3c2OC(=CC3=O)N4CCNCC4	8DQ	5.043351	9050		1330 (BMOAD_5647)
4O7C	A	Ember, S.W., Zhu, J.Y., Olesen, S.H., Martin, M.P., Becker, A., Berndt, N., Georg, G.I., Schonbrunn, E.	2014	10.1021/cb500072z	1.55	ec`ZH@@HCOEm`DefU}egfUWhxdT\|zVfvYjeffZjVjjh@@	C1CNCCC1C2=NC(=C3C=CC4=C(CCC4=C3)N=O)C(=C5C=CNC=C5)N2	2RK	5	10000
5TI7	A	Allen, B.K., Mehta, S., Ember, S.W.J., Zhu, J.Y., Schonbrunn, E., Ayad, N.G., Schurer, S.C.	2017	10.1021/acsomega.7b00553	1.65	fi{PQ@EIEKSPXc@cHhdiiDTidiihj\cghx@bjh@bf``@@	COc1ccc(cc1S(Nc2cccc(c2)N3CCCC3=O)(O)O)Br	7CQ	4.958607	11000
4CFK<NL>6G0D	A	Dittmann, A., Werner, T., Chung, C., Savitski, M.M., Falth Savitski, M., Grandi, P., Hopf, C., Lindon, M., Neubauer, G., Prinjha, R.K., Bantscheff, M., Drewes, G.<NL>Humbeck, L., Pretzel, J., Spitzer, S., Koch, O.	2014<NL>2019	10.1021/cb400789e<NL>	1.55<NL>1.31	fnka`@E@yUIfVWn[U]gIFSTkV`XJJB`bH@@	c1ccc(cc1)c2cccc3c2OC(=CC3=O)N4CCOCC4	LY2	4.91<NL>4.906578	12400		1830 (BMOAD_5709)<NL>
4O7F	A	Ember, S.W., Zhu, J.Y., Olesen, S.H., Martin, M.P., Becker, A., Berndt, N., Georg, G.I., Schonbrunn, E.	2014	10.1021/cb500072z	1.8	ehZZDH@AMGNafc`ICHhdlheLhhddilXhdjFEMLnjag`X@JVhJBhhHHH`@@	COc1ccccc1Oc2nccc(n2)c3c(ncn3C4CCNCC4)c5ccc(cc5)F	2RQ	4.886057	13000
6VUJ	A	Hilton-Proctor, J.P., Ilyichova, O., Zheng, Z., Jennings, I.G., Johnstone, R.W., Shortt, J., Mountford, S.J., Scanlon, M.J., Thompson, P.E.	2020	10.1016/j.ejmech.2020.112120	1.48	eohTJH@LAhDFmk`@cIICEDdcMDdhiddecGLnaiej`hHBBhji`hHh@@	CCN(CC)S(=O)(=O)c1ccc(c(c1)c2ccc(c(c2)OC)OC)[C@@H]3CC(=O)N(C3)C	RLY	4.86
5LJ2	A	Bamborough, P., Chung, C.W., Demont, E.H., Furze, R.C., Bannister, A.J., Che, K.H., Diallo, H., Douault, C., Grandi, P., Kouzarides, T., Michon, A.M., Mitchell, D.J., Prinjha, R.K., Rau, C., Robson, S., Sheppard, R.J., Upton, R., Watson, R.J.	2016	10.1002/anie.201603928	1.19	ebQVBH@KODj`\XDIM`@cIIBedeEDeieDdeMLedqqyDuuL]BbmUUUUPDESA@UBHJSQ@@	CC1=Cc2c(cnc(c2NC1=O)N[C@@H]3CCNC[C@H]3OCC4CCS(=O)(=O)CC4)c5cc(cnc5)N	6XW	4.79588	16000
4O71	A	Ember, S.W., Zhu, J.Y., Olesen, S.H., Martin, M.P., Becker, A., Berndt, N., Georg, G.I., Schonbrunn, E.	2014	10.1021/cb500072z	1.36	fc aR@E|\doPQFQQQJKKQISQJVKYdmFCfZxHIJABbjjbIDUU@@	C[N@]1CC[C@@H]([C@@H](C1)O)c2c(cc(c3c2OC(=CC3=O)c4ccccc4Cl)O)O	CPB	4.744727	18000
4O70	A	Ember, S.W., Zhu, J.Y., Olesen, S.H., Martin, M.P., Becker, A., Berndt, N., Georg, G.I., Schonbrunn, E.	2014	10.1021/cb500072z	1.55	ek`VD@HHAEC@d`ChIrJIJEJJIJHjIQYFaapKrJYZ@BjZfZjjjFhBh@@	CCc1cnn2c1nc(cc2NCc3ccc[n+](c3)O)N4CCCC[C@H]4CCO	1QK	4.721246	19000
4O7A	A	Ember, S.W., Zhu, J.Y., Olesen, S.H., Martin, M.P., Becker, A., Berndt, N., Georg, G.I., Schonbrunn, E.	2014	10.1021/cb500072z	1.34	fnsQa@AVHYHHblQdTTVVTTTLRVcNV|UlDATmPHPP@@	c1cc(cc(c1)Cl)C2=C(C(=O)NC2=O)Nc3ccc(c(c3)Cl)O	2RF	4.721246	19000
6V1K	A	Karim, R.M., Chan, A., Zhu, J.Y., Schonbrunn, E.	2020	10.1021/acs.jmedchem.9b01980	1.75	fegq`@DJzBNTfYgU{VU_fBTXJVjAB@BJjj@@@	CN1C=C(c2ccncc2C1=O)c3cc(c(c(c3)OC)CN(C)C)OC	5SW	4.7	20000
6V1L	A	Karim, R.M., Chan, A., Zhu, J.Y., Schonbrunn, E.	2020	10.1021/acs.jmedchem.9b01980	2.1	fegq`@DJzCqTfYgU{eWWfBTZNVjAB@`bjj@@@	CN1C=C(c2ccncc2C1=O)c3cc(c(cc3OC)CN(C)C)OC	5U6	4.7	20000
4O7B	A	Ember, S.W., Zhu, J.Y., Olesen, S.H., Martin, M.P., Becker, A., Berndt, N., Georg, G.I., Schonbrunn, E.	2014	10.1021/cb500072z	1.5	ehZZHH@AMGNaf`ICHhdlheLhhddilXheJFEMLnjagoh@JVhJBhhBBH`@@	Cc1cccc(c1C)Oc2nccc(n2)c3c(ncn3C4CCNCC4)c5ccc(cc5)F	2RJ	4.69897	20000
5MKZ	A	Humphreys, P.G., Bamborough, P., Chung, C.W., Craggs, P.D., Gordon, L., Grandi, P., Hayhow, T.G., Hussain, J., Jones, K.L., Lindon, M., Michon, A.M., Renaux, J.F., Suckling, C.J., Tough, D.F., Prinjha, R.K.	2017	10.1021/acs.jmedchem.6b01566	1.62	fhiqA@JLDPDPXHrJJJZJjIS`g^iZjjZe@@	Cc1ccsc1CNC2=C(C(=O)N(N=C2)C)Cl	RNK	4.69897	20000
4O75	A	Ember, S.W., Zhu, J.Y., Olesen, S.H., Martin, M.P., Becker, A., Berndt, N., Georg, G.I., Schonbrunn, E.	2014	10.1021/cb500072z	1.55	ea]VID@FIDjemhDLBMGH\ZPO@ZPrRSEQQQJZJOQJJUQIQIKFN^YSK@hmUTCDUDAAPAEUP@@@	CC1(C(=O)N(c2c(ccc(n2)Nc3c(cnc(n3)Nc4cc(c(c(c4)OC)OC)OC)F)O1)COP(=O)(O)O)C	2RC	4.677781	21000
5TI6	A	Allen, B.K., Mehta, S., Ember, S.W.J., Zhu, J.Y., Schonbrunn, E., Ayad, N.G., Schurer, S.C.	2017	10.1021/acsomega.7b00553	1.7	fakQc@LQ`bh@aT`ZPrRPjJJJIXpsQVCyK^kT@Q@DTtD@@	c1cc(cc(c1)N2CCCC2=O)NS(=O)(=O)c3c(cccc3F)F	7CO	4.677781	21000
5O97	A	Zhu, J., Marchand, J.R., Caflisch, A.			1.3	fhiQb@B\qXH@cIEEBmDeLbTLzff`BJPDJH	COc1cc(ccc1O)/C=C\2/C(=NC(=O)S2)N	9OE	4.66	22000
4HBV	A	Fish, P.V., Filippakopoulos, P., Bish, G., Brennan, P.E., Bunnage, M.E., Cook, A.S., Federov, O., Gerstenberger, B.S., Jones, H., Knapp, S., Marsden, B., Nocka, K., Owen, D.R., Philpott, M., Picaud, S., Primiano, M.J., Ralph, M.J., Sciammetta, N., Trzupek, J.D.	2012	10.1021/jm3010515	1.63	dk]H`AdpqDfUmUiiV@Bjd`@	CN1Cc2cc(ccc2NC1=O)Br	15E	4.638272	23000
5TI2	A	Allen, B.K., Mehta, S., Ember, S.W.J., Zhu, J.Y., Schonbrunn, E., Ayad, N.G., Schurer, S.C.	2017	10.1021/acsomega.7b00553	1.65	fnsQa@LA``h@ataddaTTRRTtltVoVcUju@@ADTtD@@	c1cc(cc(c1)N2CCCC2=O)NS(=O)(=O)c3cccc(c3)F	7CJ	4.619789	24000
5M39	A	Geist, L., Mayer, M., Cockcroft, X.L., Wolkerstorfer, B., Kessler, D., Engelhardt, H., McConnell, D.B., Konrat, R.	2017	10.1021/acs.jmedchem.7b00845	1.38	fbmH`@MVbdELdTtRRLRTrgIN}EMAADttlT@@	Cc1nnc2n1nc(cc2)c3ccc(c(c3)OC)OC	7EA	4.619789	24000
6PS9	A	Hilton-Proctor, J.P., Ilyichova, O., Zheng, Z., Jennings, I.G., Johnstone, R.W., Shortt, J., Mountford, S.J., Scanlon, M.J., Thompson, P.E.	2019	10.1016/j.bmc.2019.115157	1.21	fnkp`@DJrAjSKKNk{JkNBTYvRmTpPQUUME@L@@	CN1C[C@@H](CC1=O)CCn2c3ccccc3c4c2CCNC4=O	Y17	4.619789	24000
5TI4	A	Allen, B.K., Mehta, S., Ember, S.W.J., Zhu, J.Y., Schonbrunn, E., Ayad, N.G., Schurer, S.C.	2017	10.1021/acsomega.7b00553	1.62	fakQc@MQdjhH`d`HHrJJKKREQISSQLxEK^pPDm@DTtD@@	c1cc(cc(c1)N2CCCC2=O)NS(=O)(=O)c3ccc(c(c3)Cl)F	7CM	4.585027	26000
4YH3	A	Duffy, B.C., Liu, S., Martin, G.S., Wang, R., Hsia, M.M., Zhao, H., Guo, C., Ellis, M., Quinn, J.F., Kharenko, O.A., Norek, K., Gesner, E.M., Young, P.R., McLure, K.G., Wagner, G.S., Lakshminarasimhan, D., White, A., Suto, R.K., Hansen, H.C., Kitchen, D.B.	2015	10.1016/j.bmcl.2015.04.107	1.6	ek`TL@@DJ@MMlbbRbRTQfbRTVVrhXTlJzfVZhHFIB@@Bh@BAr@	COc1ccc(cc1)/C=C(\c2ccccc2)/C(=O)N3CC(=O)Nc4c3cccc4	Y80	4.585027	26000
4YH4	A	Duffy, B.C., Liu, S., Martin, G.S., Wang, R., Hsia, M.M., Zhao, H., Guo, C., Ellis, M., Quinn, J.F., Kharenko, O.A., Norek, K., Gesner, E.M., Young, P.R., McLure, K.G., Wagner, G.S., Lakshminarasimhan, D., White, A., Suto, R.K., Hansen, H.C., Kitchen, D.B.	2015	10.1016/j.bmcl.2015.04.107	1.33	figp`@DTBCVQQIQIJHsIKQITXjtT}FuPPL@A@A@@@@	c1ccc(cc1)c2cc(cnc2)C(=O)N3CC(=O)Nc4c3cccc4	Y81	4.585027	26000
5EI4	A	Raux, B., Voitovich, Y., Derviaux, C., Lugari, A., Rebuffet, E., Milhas, S., Priet, S., Roux, T., Trinquet, E., Guillemot, J.C., Knapp, S., Brunel, J.M., Fedorov, A.Y., Collette, Y., Roche, P., Betzi, S., Combes, S., Morelli, X.	2016	10.1021/acs.jmedchem.5b01708	1.05	ek`QDD@ACKHaimcmD`HbhHRYWVYmU]^UhX\|BbVv`@jffYjijbd@@	CCn1c(nc2c1C(=O)NC(=O)N2Cc3ccc(cc3)Cl)CSc4[nH]nc(n4)N	5NV	4.578396	26400
4A9L	A	Chung, C.W., Dean, A.W., Woolven, J.M., Bamborough, P.	2012	10.1021/jm201320w	1.6	ffcpR@LAcAEj`BLddLTRRVaRbRkF]EJuPTDUULP@@	CN1Cc2cc(ccc2N(C1=O)C)S(=O)(=O)N3CCOCC3	P9L	4.522879	30000
4LR6	A	Gehling, V.S., Hewitt, M.C., Vaswani, R.G., Leblanc, Y., Cote, A., Nasveschuk, C.G., Taylor, A.M., Harmange, J.C., Audia, J.E., Pardo, E., Joshi, S., Sandy, P., Mertz, J.A., Sims, R.J., Bergeron, L., Bryant, B.M., Bellon, S., Poy, F., Jayaram, H., Sankaranarayanan, R., Yellapantula, S., Bangalore Srinivasamurthy, N., Birudukota, S., Albrecht, B.K.	2013	10.1021/ml4001485	1.29	dk]H@HHDiY~UrmNfZ@B@@	Cc1c(c(on1)N)c2ccccc2	1XA	4.481486	33000
4DON	A	Xiong, B., Cao, D.Y., Chen, W.Y., Chen, T.T., Xu, Y.C., Shen, J.K.			1.52	dcmH@DpDfY]UnWVjh@@@@	CN1Cc2ccccc2NC1=O	3PF	4.408935	39000		17000-102000 (BDB)
5TI5	A	Allen, B.K., Mehta, S., Ember, S.W.J., Zhu, J.Y., Schonbrunn, E., Ayad, N.G., Schurer, S.C.	2017	10.1021/acsomega.7b00553	1.83	fnsQa@EAEHhLQ`QdTRTteTRTttUN^cUl@Pm@DTrD@@	c1cc(cc(c1)N2C=CCC2=O)NS(=O)(=O)c3cccc(c3)Br	7CN	4.387216	41000
4MEO	A	Vidler, L.R., Filippakopoulos, P., Fedorov, O., Picaud, S., Martin, S., Tomsett, M., Woodward, H., Brown, N., Knapp, S., Hoelder, S.	2013	10.1021/jm4011302	1.72	ffcP`BDA@TLeyIge[nVUQJ|EMVh@`@@J@@@@	Cc1cc(c2ccccc2[n+]1[O-])c3cccc(c3)NC(=O)C	25V	4.376751	42000
5TI3	A	Allen, B.K., Mehta, S., Ember, S.W.J., Zhu, J.Y., Schonbrunn, E., Ayad, N.G., Schurer, S.C.	2017	10.1021/acsomega.7b00553	1.7	fakQc@IQxJhLP`P[DrJJIRJiSISSQLTEK^pPKE@DTtD@@	c1cc(cc(c1)N2CCCC2=O)NS(=O)(=O)c3cc(ccc3Br)Br	7CG	4.356547	44000
6AFR	A	Xing, J., Zhang, R., Jiang, X., Hu, T., Wang, X., Qiao, G., Wang, J., Yang, F., Luo, X., Chen, K., Shen, J., Luo, C., Jiang, H., Zheng, M.	2018	10.1016/j.ejmech.2018.11.018	2	fdeqB@DTmDD`drzsKNdhYw`tmP@@E@@@	c1cc2c(ccc(c2nc1)O)Cn3cc(nc3)F	9.00E+03	4.154902	70000
6PSB	A	Hilton-Proctor, J.P., Ilyichova, O., Zheng, Z., Jennings, I.G., Johnstone, R.W., Shortt, J., Mountford, S.J., Scanlon, M.J., Thompson, P.E.	2019	10.1016/j.bmc.2019.115157	1.59	ffsp`@DJRBjSKKNk|jlxIQgIruSAAEUSQP|`@	CN1C[C@H](CC1=O)Cn2c3ccccc3c4c2CCNC4=O	Y18	4.102373	79000
4C66	A	Mirguet, O., Gosmini, R., Toum, J., Clement, C., Barnathan, M., Brusq, J., Mordaunt, J.E., Grimes, R., Crowe, M., Pineau, O., Ajakane, M., Daugan, A., Jeffrey, P., Cutler, L., Haynes, A., Smithers, N., Chung, C., Bamborough, P., Uings, I.J., Lewis, T., Witherington, J., Parr, N., Prinjha, R., Nicodeme, E.	2013	10.1021/jm401088k	1.87	fnkHADN^bTDPxH}JSLl{[KjkIV|xJRpPLSUJuQT@@	CCc1cc2c(s1)-[n+]3c([nH]nc3CN=C2c4ccccc4Cl)C	H4C	4.100179	79400
4UYD	A	Demont, E.H., Bamborough, P., Chung, C.W., Craggs, P.D., Fallon, D., Gordon, L.J., Grandi, P., Hobbs, C.I., Hussain, J., Jones, E.J., Le Gall, A., Michon, A.M., Mitchell, D.J., Prinjha, R.K., Roberts, A.D., Sheppard, R.J., Watson, R.J.	2014	10.1021/ml5002932	1.37	foAp`@DX\BrSLsz|QbmMUPAL@@@	CN1c2ccc(cc2N(C1=O)C)C(=O)N	V1T	4.099999	79433
4HXN	A	Zhao, L., Cao, D., Chen, T., Wang, Y., Miao, Z., Xu, Y., Chen, W., Wang, X., Li, Y., Du, Z., Xiong, B., Li, J., Xu, C., Zhang, N., He, J., Shen, J.	2013	10.1021/jm301793a	1.49	dk^HPBp@bYCIEDUEEbkSifB@`@@	c1ccc(c(c1)C2=CSC(=O)N2)F	1A7	4	>100000
4MEN	A	Vidler, L.R., Filippakopoulos, P., Fedorov, O., Picaud, S., Martin, S., Tomsett, M., Woodward, H., Brown, N., Knapp, S., Hoelder, S.	2013	10.1021/jm4011302	1.81	fbmh@@@TYIVRJJKIFKQIYgARbejYjj@Bd@@	Cc1ccc(cc1)CN(C)c2cc(nc3n2ncn3)C	25K	3.90309	125000
5MLI	A	Humphreys, P.G., Bamborough, P., Chung, C.W., Craggs, P.D., Gordon, L., Grandi, P., Hayhow, T.G., Hussain, J., Jones, K.L., Lindon, M., Michon, A.M., Renaux, J.F., Suckling, C.J., Tough, D.F., Prinjha, R.K.	2017	10.1021/acs.jmedchem.6b01566	1.63	dmwH`JXRBHRYfyxZVji@@	CNC1=C(C(=O)N(N=C1)C)Cl	82I	3.886057	130000
6VUC	A	Hilton-Proctor, J.P., Ilyichova, O., Zheng, Z., Jennings, I.G., Johnstone, R.W., Shortt, J., Mountford, S.J., Scanlon, M.J., Thompson, P.E.	2020	10.1016/j.ejmech.2020.112120	1.55	ffcQb@LI`bh@cIICEDdebhddjqgIrmTEAEUSECr@@	CN1C[C@H](CC1=O)c2ccc(cc2)S(=O)(=O)N3CCCCC3	RLS	3.84
6VUF	A	Hilton-Proctor, J.P., Ilyichova, O., Zheng, Z., Jennings, I.G., Johnstone, R.W., Shortt, J., Mountford, S.J., Scanlon, M.J., Thompson, P.E.	2020	10.1016/j.ejmech.2020.112120	1.59	fbuQb@LA`cH@cIIBhddbhddhpXkTDDUUIPl`@	CCCNS(=O)(=O)c1ccc(cc1)[C@H]2CC(=O)N(C2)C	RLV	3.83
4MEQ	A	Vidler, L.R., Filippakopoulos, P., Fedorov, O., Picaud, S., Martin, S., Tomsett, M., Woodward, H., Brown, N., Knapp, S., Hoelder, S.	2013	10.1021/jm4011302	1.77	fhyh@@@TYKRTsNkvkNBexKTsU@AH@@	Cc1cc(n2c(n1)nc(n2)N)c3ccccc3	25O	3.60206	250000
6VUB	A	Hilton-Proctor, J.P., Ilyichova, O., Zheng, Z., Jennings, I.G., Johnstone, R.W., Shortt, J., Mountford, S.J., Scanlon, M.J., Thompson, P.E.	2020	10.1016/j.ejmech.2020.112120	1.5	dk^H@DCHhhbhdb[SZj`@bF`@	CN1C[C@H](CC1=O)c2ccccc2	RLG	2.943095	1140000
6PRT	A	Hilton-Proctor, J.P., Ilyichova, O., Zheng, Z., Jennings, I.G., Johnstone, R.W., Shortt, J., Mountford, S.J., Scanlon, M.J., Thompson, P.E.	2019	10.1016/j.bmc.2019.115157	1.3	dcNL@DBUrJJHiSDsUUMTM@@	CN1C[C@H](CC1=O)CC(=O)OC	OWA	2.673664	2120000
5HCL	A	Ghayor, C., Gjoksi, B., Dong, J., Siegenthaler, B., Caflisch, A., Weber, F.E.	2017	10.1038/srep42108	1.5	gGY@DDfYj`@	CC(=O)N(C)C	5Y9	2.221849	6000000
3U5J	A	Filippakopoulos, P., Picaud, S., Fedorov, O., Keller, M., Wrobel, M., Morgenstern, O., Bracher, F., Knapp, S.	2012	10.1016/j.bmc.2011.10.080	1.6	ffsHB@AJSdDPdrmrlvkMNZ]Fj\pACTE@lDP@@	Cc1nnc2n1-c3ccc(cc3C(=NC2)c4ccccc4)Cl	08H	NaN			2460 (BMOAD_5662), 2460 (BDB), 2460 (PDBbind)
3U5K	A	Filippakopoulos, P., Picaud, S., Fedorov, O., Keller, M., Wrobel, M., Morgenstern, O., Bracher, F., Knapp, S.	2012	10.1016/j.bmc.2011.10.080	1.8	fnkpA@AJJBHCHILk\kMrmtyirVyK@DMPU@lDP@@	Cc1ncc2n1-c3ccc(cc3C(=NC2)c4ccccc4F)Cl	08J	NaN
3U5L	A	Filippakopoulos, P., Picaud, S., Fedorov, O., Keller, M., Wrobel, M., Morgenstern, O., Bracher, F., Knapp, S.	2012	10.1016/j.bmc.2011.10.080	1.39	fnkhB@AJudhHaIe[eYeUngMNRwIX@ajBhE`b@@	Cc1nnc2n1-c3ccc(cc3C(=NN2C)c4ccccc4)Cl	08K	NaN			640 (BMOAD_5665), 640 (BDB), 640 (PDBbind)
4HXP	A	Zhao, L., Cao, D., Chen, T., Wang, Y., Miao, Z., Xu, Y., Chen, W., Wang, X., Li, Y., Du, Z., Xiong, B., Li, J., Xu, C., Zhang, N., He, J., Shen, J.	2013	10.1021/jm301793a	1.73	foAQ`@LN@brSK]klQbmMU@AM@@@	c1cc(ccc1C(=O)N)N2CCOC2=O	1A5	NaN
4HXO	A	Zhao, L., Cao, D., Chen, T., Wang, Y., Miao, Z., Xu, Y., Chen, W., Wang, X., Li, Y., Du, Z., Xiong, B., Li, J., Xu, C., Zhang, N., He, J., Shen, J.	2013	10.1021/jm301793a	1.76	fhyIB@LDYZP@cIEDeELddV\MzsjZjfZYd@@	Cc1cc(on1)CSc2nnc3n2cccc3	1A6	NaN
4HXK	A	Zhao, L., Cao, D., Chen, T., Wang, Y., Miao, Z., Xu, Y., Chen, W., Wang, X., Li, Y., Du, Z., Xiong, B., Li, J., Xu, C., Zhang, N., He, J., Shen, J.	2013	10.1021/jm301793a	1.61	f`iqB@AZ\h@PeLk{\nJ\D{uLuSTmP@@	c1csc2c1CN(CC2)C(=O)n3ccnc3	1AJ	NaN
4LYW	A	Lucas, X., Wohlwend, D., Hugle, M., Schmidtkunz, K., Gerhardt, S., Schule, R., Jung, M., Einsle, O., Gunther, S.	2013	10.1002/anie.201307652	1.95	fkoqR@LVsA@X{@DYIHXhddYdhXeDehYuVkUAPQSSUTp`@@	CCc1c(c([nH]c1C(=O)Nc2cc(ccc2O)S(=O)(=O)N(CC)CC)C)C(=O)C	21Q	NaN			237 (BMOAD_5737), 240 (BDB)
4LYS	A	Lucas, X., Wohlwend, D., Hugle, M., Schmidtkunz, K., Gerhardt, S., Schule, R., Jung, M., Einsle, O., Gunther, S.	2013	10.1002/anie.201307652	1.83	fco`p@M@IDoUyEEEeLhhdheLhunB\GHviZj`jAjJfHR`@	CC(=O)N[C@H]1CCc2cc(c(c(c2C3=CC=C(C(=O)C=C13)O)OC)OC)OC	2SJ	NaN
4QB3	A	Gacias, M., Gerona-Navarro, G., Plotnikov, A.N., Zhang, G., Zeng, L., Kaur, J., Moy, G., Rusinova, E., Rodriguez, Y., Matikainen, B., Vincek, A., Joshua, J., Casaccia, P., Zhou, M.M.	2014	10.1016/j.chembiol.2014.05.009	0.94	ffcp`@DJR@jSKKNkzkLxIQgMTpPQUST@@@	CC(=O)NCCCCn1c2ccccc2c3c1CCNC3=O	30M	NaN			3300->300000 (BDB), 3400 (BMOAD_5643)
4NUC	A	Zhang, G., Plotnikov, A.N., Rusinova, E., Shen, T., Morohashi, K., Joshua, J., Zeng, L., Mujtaba, S., Ohlmeyer, M., Zhou, M.-M.	2013	10.1021/jm401334s	1.4	fmwIb@LBCFBE`BLddJbbRRvrTRTRtzwf}Vh@@@f@Bh@D@p	Cc1cc(cc(c1O)C)/N=N/c2ccc(cc2)S(=O)(=O)Nc3ccccn3	435	NaN		910-4300 (BDB), 910 (BMOAD_5711)
4XYA	A	Picaud, S., Strocchia, M., Terracciano, S., Lauro, G., Mendez, J., Daniels, D.L., Riccio, R., Bifulco, G., Bruno, I., Filippakopoulos, P.	2015	10.1021/jm501893k	2.05	fb}iB@INCGN`XfQQIQJIIPqJgMF|ENX@bBRBXb@@	c1coc2c1cc(cc2c3c4c([nH]cn4)nc(n3)N)Br	43S	NaN			1370 (BMOAD_5716)
4XY9	A	Picaud, S., Strocchia, M., Terracciano, S., Lauro, G., Mendez, J., Daniels, D.L., Riccio, R., Bifulco, G., Bruno, I., Filippakopoulos, P.	2015	10.1021/jm501893k	1.83	fluiB@AF|EJ`XbSJwJrrty[tTpA@QDSA@@@	COc1ccc(cc1c2c3c([nH]cn3)nc(n2)N)Br	43U	NaN			7651 (BMOAD_5755)
4ZC9	A	Winter, G.E., Buckley, D.L., Paulk, J., Roberts, J.M., Souza, A., Dhe-Paganon, S., Bradner, J.E.	2015	10.1126/science.aab1433	0.99	en{qND@A@lniom\qh\U_TvpHcpHrJIKJIQQQQKKJJyIISIQQJJEZZKZabpKrJkjVwTtnn@BZZjYjfjjfhHFbZZdiJPTSj@@	Cc1c(sc-2c1C(=N[C@H](c3n2c(nn3)C)CC(=O)NCCCCNC(=O)COc4cccc5c4C(=O)N(C5=O)[C@H]6CCC(=O)NC6=O)c7ccc(cc7)Cl)C	4MW	NaN
5LRQ	A	Myers, S.M., Miller, D.C., Molyneux, L., Arasta, M., Bawn, R.H., Blackburn, T.J., Cook, S.J., Edwards, N., Endicott, J.A., Golding, B.T., Griffin, R.J., Hammonds, T., Hardcastle, I.R., Harnor, S.J., Heptinstall, A.B., Lochhead, P.A., Martin, M.P., Martin, N.C., Newell, D.R., Owen, P.J., Pang, L.C., Reuillon, T., Rigoreau, L.J.M., Thomas, H.D., Tucker, J.A., Wang, L.Z., Wong, A.C., Noble, M.E.M., …	2019	10.1016/j.ejmech.2019.05.057	1.7	el^VL@@DEKGDc`Fd\bbbbfbRRuRbbRrtRVDTLB\bFVAaZh@`BB``bjjhB@@@	CCOc1cc(ccc1Nc2ncc3c(n2)N(c4ccccc4C(=O)N3C)C)N5CCC(CC5)O	4WG	NaN			1600
5D25	A	Hugle, M., Lucas, X., Weitzel, G., Ostrovskyi, D., Breit, B., Gerhardt, S., Einsle, O., Gunther, S., Wohlwend, D.	2016	10.1021/acs.jmedchem.5b01267	1.7	fcwqR@LVsA@Xk@DYIHXhddYdhXeDcCNjuZhJBJZZjXP@@	CCN(CC)S(=O)(=O)c1ccc(c(c1)NC(=O)c2c(c(c([nH]2)C)C(=O)C)C)O	56M	NaN			460 (BMOAD_5679), 460 (BDB)
5D3T	A	Hugle, M., Lucas, X., Weitzel, G., Ostrovskyi, D., Breit, B., Gerhardt, S., Einsle, O., Gunther, S., Wohlwend, D.	2016	10.1021/acs.jmedchem.5b01267	1.93	fikq`@DJ|Bw\bfbRaTTLRbRtxJJV`@jffjia@@	CCc1c(c([nH]c1C(=O)N(C)Cc2cccc(c2)C(=O)N)C)C(=O)C	56Y	NaN			12000 (BMOAD_5752), 12000 (BDB)
5D3S	A	Hugle, M., Lucas, X., Weitzel, G., Ostrovskyi, D., Breit, B., Gerhardt, S., Einsle, O., Gunther, S., Wohlwend, D.	2016	10.1021/acs.jmedchem.5b01267	1.75	eg`\JD@L@bhDGDc`@cRPrRPqQIQHhjZIQIZJNV^M]KUATDTtuUMB@@@	CCc1c(c([nH]c1C(=O)Nc2ccc(c(c2)S(=O)(=O)N3CCOCC3)F)C)C(=O)C	579	NaN			1300 (BMOAD_5736), 1300 (BDB)
5D3R	A	Hugle, M., Lucas, X., Weitzel, G., Ostrovskyi, D., Breit, B., Gerhardt, S., Einsle, O., Gunther, S., Wohlwend, D.	2016	10.1021/acs.jmedchem.5b01267	2.2	eoh\BH@LOBhDDc`@cIICEDddeKiheDehc@kGFnej`hJbZZjfbP@@	CCCc1c(c([nH]c1C(=O)Nc2cccc(c2)S(=O)(=O)N3CCCCCC3)C)C(=O)C	57C	NaN
5D3P	A	Hugle, M., Lucas, X., Weitzel, G., Ostrovskyi, D., Breit, B., Gerhardt, S., Einsle, O., Gunther, S., Wohlwend, D.	2016	10.1021/acs.jmedchem.5b01267	1.95	fmwpR@LJcAGi`BLddJfRfbTlRbRtejsleVh@biijjXT@@	CCc1c(c([nH]c1C(=O)n2ccc3c2cc(cc3)S(=O)(=O)NC)C)C(=O)C	57E	NaN			7400 (BMOAD_5677)
5D3L	A	Hugle, M., Lucas, X., Weitzel, G., Ostrovskyi, D., Breit, B., Gerhardt, S., Einsle, O., Gunther, S., Wohlwend, D.	2016	10.1021/acs.jmedchem.5b01267	1.5	fg qR@L^KA@Tg@DYIHXhdhcdmMDhdmKN[uZhJHJffjia@@	CCc1c(c([nH]c1C(=O)Nc2cc(c(cc2O)C)S(=O)(=O)N(CC)CC)C)C(=O)C	57F	NaN			880 (BMOAD_5714), 880 (BDB)
5D3H	A	Hugle, M., Lucas, X., Weitzel, G., Ostrovskyi, D., Breit, B., Gerhardt, S., Einsle, O., Gunther, S., Wohlwend, D.	2016	10.1021/acs.jmedchem.5b01267	1.7	fg pr@LVsA@X{n@HrRPqQIHsIPqJIKPf]UjuPTDTtuUMB@@	CCc1c(c([nH]c1C(=O)Nc2cc(ccc2O)S(=O)(=O)N(CC)CC)C)C(=O)CO	57G	NaN			7900 (BMOAD_5634), 7900 (BDB)
5DLZ	A	Milhas, S., Raux, B., Betzi, S., Derviaux, C., Roche, P., Restouin, A., Basse, M.J., Rebuffet, E., Lugari, A., Badol, M., Kashyap, R., Lissitzky, J.C., Eydoux, C., Hamon, V., Gourdel, M.E., Combes, S., Zimmermann, P., Aurrand-Lions, M., Roux, T., Rogers, C., Muller, S., Knapp, S., Trinquet, E., Collette, Y., Guillemot, J.C., Morelli, X.	2016	10.1021/acschembio.6b00286	1.7	edZ\L@@DDi`IHdfY[U_Vue]YVXxtlFf~AZiBBJfjjj@Bb@@@	Cc1cccc(c1)CN2CCC(CC2)CNC(=O)CCCOC3=CC(=O)N(c4c3cccc4)C	5D1	NaN			1800 (BMOAD_5680)
5DLX	A	Milhas, S., Raux, B., Betzi, S., Derviaux, C., Roche, P., Restouin, A., Basse, M.J., Rebuffet, E., Lugari, A., Badol, M., Kashyap, R., Lissitzky, J.C., Eydoux, C., Hamon, V., Gourdel, M.E., Combes, S., Zimmermann, P., Aurrand-Lions, M., Roux, T., Rogers, C., Muller, S., Knapp, S., Trinquet, E., Collette, Y., Guillemot, J.C., Morelli, X.	2016	10.1021/acschembio.6b00286	1.9	el^QHH@FC@aec`XT`HaIe[m]U[e]e[ZccPshZyxFF@HjjjfjjZZVJh@@	Cc1nnc2n1nc(cc2)N3CCC(CC3)C(=O)NCCCN4CCN(CC4)c5cccc(c5)Cl	5D2	NaN			2000 (BMOAD_5632)
5DW2	A	Kharenko, O.A., Gesner, E.M., Patel, R.G., Norek, K., White, A., Fontano, E., Suto, R.K., Young, P.R., McLure, K.G., Hansen, H.C.	2016	10.1016/j.bbrc.2016.06.021	1.12	eod\B@@DNE`IDnlbbTTTVbVVTRURTRXxt|brn^Z`Z@HBJjjj``@@	Cc1cc(cc(c1OCCN2CCCC2)C)C3=Nc4cc(cc(c4C(=O)N3)OC)OC	5GD	NaN			185 (BMOAD_5676)
5E0R	A	Dong, J., Caflish, A.			1.35	fmgqs@B^CcQkCflDPHHzDYDieEDiDteDeeHiuVttDBqL@Dl@H^`	c1cc(ccc1/N=N/c2ccc(c(c2)S(=O)(=O)O)NC(=O)CCl)S(=O)(=O)O	5J5	NaN
5ULA	A	Cheung, K., Lu, G., Sharma, R., Vincek, A., Zhang, R., Plotnikov, A.N., Zhang, F., Zhang, Q., Ju, Y., Hu, Y., Zhao, L., Han, X., Meslamani, J., Xu, F., Jaganathan, A., Shen, T., Zhu, H., Rusinova, E., Zeng, L., Zhou, J., Yang, J., Peng, L., Ohlmeyer, M., Walsh, M.J., Zhang, D.Y., Xiong, H., Zhou, M.M.	2017	10.1073/pnas.1615601114	1.5	fegQb@BVLdXHcHhhddihhlcLedpS`m{AADsUR@ED@@@	CC1=C(CCC1=O)Nc2ccc(cc2Cl)C(=O)Nc3ccc(cc3)OC	5MJ	NaN		77 (BMOAD_5691)
5F5Z	A	Ember, S.W., Lambert, Q.T., Berndt, N., Gunawan, S., Ayaz, M., Tauro, M., Zhu, J.Y., Cranfill, P.J., Greninger, P., Lynch, C.C., Benes, C.H., Lawrence, H.R., Reuther, G.W., Lawrence, N.J., Schonbrunn, E.	2017	10.1158/1535-7163.MCT-16-0568-T	1.76	eb^^DH@LK@jfkdXD@@cIIBiEJeMheEJhdlhdlXyeUl]BbmUPAD@QP@UUPD@@@	Cc1cnc(nc1Nc2cccc(c2)NS(=O)(=O)C(C)(C)C)Nc3ccc(cc3)N4CCN(CC4)C	5VY	NaN			86 (BMOAD_5744)
5F60	A	Ember, S.W., Lambert, Q.T., Berndt, N., Gunawan, S., Ayaz, M., Tauro, M., Zhu, J.Y., Cranfill, P.J., Greninger, P., Lynch, C.C., Benes, C.H., Lawrence, H.R., Reuther, G.W., Lawrence, N.J., Schonbrunn, E.	2017	10.1158/1535-7163.MCT-16-0568-T	1.35	ejQ^DD@BCHfnglYE@Hc`HrJJIKRHrJqJJUQIYQIY`PihzyGFBBEjj@Hh@JjhB@@@	Cc1cnc(nc1Nc2ccc(c(c2)NS(=O)(=O)C(C)(C)C)Cl)Nc3ccc(cc3)N4CCN(CC4)C	5VZ	NaN			43 (BMOAD_5683)
5F61	A	Ember, S.W., Lambert, Q.T., Berndt, N., Gunawan, S., Ayaz, M., Tauro, M., Zhu, J.Y., Cranfill, P.J., Greninger, P., Lynch, C.C., Benes, C.H., Lawrence, H.R., Reuther, G.W., Lawrence, N.J., Schonbrunn, E.	2017	10.1158/1535-7163.MCT-16-0568-T	1.45	ejQ^DD@LK@jfglXD@@`zPrRPjQRiSZIQRjIJEQIXqsJkZyGEZj`BH@b`BJjhB@@@	Cc1cnc(nc1Nc2cccc(c2)NS(=O)(=O)C(C)(C)C)Nc3ccc(c(c3)F)N4CCN(CC4)C	5W0	NaN			35 (BMOAD_5668)
5F62	A	Ember, S.W., Lambert, Q.T., Berndt, N., Gunawan, S., Ayaz, M., Tauro, M., Zhu, J.Y., Cranfill, P.J., Greninger, P., Lynch, C.C., Benes, C.H., Lawrence, H.R., Reuther, G.W., Lawrence, N.J., Schonbrunn, E.	2017	10.1158/1535-7163.MCT-16-0568-T	1.35	efY^DL@BCHfnobYE@Hc`HndLbbbRtbLblRbeTRTJbRs@aSQsvILDDKUT@QPAEUTA@@@	Cc1cnc(nc1Nc2ccc(c(c2)NS(=O)(=O)C(C)(C)C)Cl)Nc3ccc(c(c3)F)N4CCN(CC4)C	5W1	NaN			6.8 (BMOAD_5735)
5F63	A	Ember, S.W., Lambert, Q.T., Berndt, N., Gunawan, S., Ayaz, M., Tauro, M., Zhu, J.Y., Cranfill, P.J., Greninger, P., Lynch, C.C., Benes, C.H., Lawrence, H.R., Reuther, G.W., Lawrence, N.J., Schonbrunn, E.	2017	10.1158/1535-7163.MCT-16-0568-T	1.45	eiS^LL@BCHfnh^YE@PHc`HndLbbbRtbLblRbeTRTJfTRVXDJZN^Yy``aZj`BJ@Hfjj`H@@	Cc1cnc(nc1Nc2ccc(c(c2)NS(=O)(=O)C(C)(C)C)Cl)Nc3ccc(c(c3)F)C(=O)NC4CCN(CC4)C	5W2	NaN			12 (BMOAD_5618)
5FBX	A	Tallant, C., Clark, P.G.K., Siejka, P., Fedorov, O., Nowak, R., Srikannathasan, V., von Delft, F., Arrowsmith, C.H., Edwards, A.M., Bountra, C., Muller, S., Brennan, P.E., Dixon, D., Knapp, S.			1.85	fa{P`@DM@UIfYugU{fHqUoQJuj``@BFihJAD@	Cc1c(c(on1)C)c2ccc3c(c2)[C@@H](N(C3=O)C)c4ccccc4	5W4	NaN
5HQ5	A	Chen, T.T.			1.6	fdeh@@@TXIVRJJKIEQQIgARCEjYj`HI@@@	Cc1ccccc1Nc2cc(nc3n2cnn3)C	64Q	NaN
5HQ6	A	Chen, T.T.			1.95	dk^D@DBlbbTTJRkeujh@JHq@@	Cc1ccc2c(c1)NC(=O)[C@H](O2)C	64R	NaN
5HQ7	A	Chen, T.T.			1.9	fhip`@EV\BfRJZIIYJE\dZuAA@AT@@@	CCNc1c2cc(c(cc2ncn1)OC)OC	64S	NaN
5WMA	A	Ozer, H.G., El-Gamal, D., Powell, B., Hing, Z.A., Blachly, J.S., Harrington, B., Mitchell, S., Grieselhuber, N.R., Williams, K., Lai, T.H., Alinari, L., Baiocchi, R.A., Brinton, L., Baskin, E., Cannon, M., Beaver, L., Goettl, V.M., Lucas, D.M., Woyach, J.A., Sampath, D., Lehman, A.M., Yu, L., Zhang, J., Ma, Y., Zhang, Y., Spevak, W., Shi, S., Severson, P., Shellooe, R., Carias, H., Tsang, G., Don…	2018	10.1158/2159-8290.CD-17-0902	1.4	f`iq@@HJ\CIDhdXdde`fcN}Ru@ASD@@	Cc1c(c(on1)C)c2cc3cc[nH]c3nc2	6JC	NaN
5WMD	A	Ozer, H.G., El-Gamal, D., Powell, B., Hing, Z.A., Blachly, J.S., Harrington, B., Mitchell, S., Grieselhuber, N.R., Williams, K., Lai, T.H., Alinari, L., Baiocchi, R.A., Brinton, L., Baskin, E., Cannon, M., Beaver, L., Goettl, V.M., Lucas, D.M., Woyach, J.A., Sampath, D., Lehman, A.M., Yu, L., Zhang, J., Ma, Y., Zhang, Y., Spevak, W., Shi, S., Severson, P., Shellooe, R., Carias, H., Tsang, G., Don…	2018	10.1158/2159-8290.CD-17-0902	1.27	edVZDD@A@lniahPHcpHrJIKJIQQQQKKJJzIKTLVA^QU]_@p@SSUSMTu@AEI@h`@	Cc1c(sc-2c1C(=N[C@H](c3n2c(nn3)C)CC(=O)Nc4ccc(cc4)O)c5ccc(cc5)Cl)C	6JE	NaN
5WMG	A	Ozer, H.G., El-Gamal, D., Powell, B., Hing, Z.A., Blachly, J.S., Harrington, B., Mitchell, S., Grieselhuber, N.R., Williams, K., Lai, T.H., Alinari, L., Baiocchi, R.A., Brinton, L., Baskin, E., Cannon, M., Beaver, L., Goettl, V.M., Lucas, D.M., Woyach, J.A., Sampath, D., Lehman, A.M., Yu, L., Zhang, J., Ma, Y., Zhang, Y., Spevak, W., Shi, S., Severson, P., Shellooe, R., Carias, H., Tsang, G., Don…	2018	10.1158/2159-8290.CD-17-0902	1.19	ehZRL@@CGFg`DCdfyWYeUy[eYg`RqpIKXDyyh@JP`bhFBfBB`bP@	Cc1c(c(on1)C)c2cc3c(c(cn3[C@@H](C)c4ccccn4)c5ccc(cc5)C(=O)O)nc2	6JF	NaN
5KDH	A	Ayoub, A.M., Hawk, L.M.L., Herzig, R.J., Jiang, J., Wisniewski, A.J., Gee, C.T., Zhao, P., Zhu, J.Y., Berndt, N., Offei-Addo, N.K., Scott, T.G., Qi, J., Bradner, J.E., Ward, T.R., Schonbrunn, E., Georg, G.I., Pomerantz, W.C.K.	2017	10.1021/acs.jmedchem.6b01336	1.5	figpP@DXxATRyEEDhddXdeEelpQkAbwkUTsSU@`UQ@t@@	CCN1C2=C([C@@H](C3=C(N2)COC3=O)c4ccc(cc4)C)C(=O)NC1=O	6RX	NaN		370 (BMOAD_5727)
5LUU	A	Navratilova, I., Aristotelous, T., Picaud, S., Chaikuad, A., Knapp, S., Filappakopoulos, P., Hopkins, A.L.	2016	10.1021/acsmedchemlett.6b00154	1.61	fluq@@DZlAIfU{gmQJuZJVjjeh@J@@@	CCC(=O)N1CCc2c(c(n[nH]2)c3ccccc3)C1	77X	NaN			8630 (BMOAD_5739), 8630-97000 (BDB)
5VBP	A	EMBER, S.W., BERNDT, N., ZHU, J.-Y., KARIM, R.M., SCHONBRUNN, E.			1.83	en]^LD@FNK@bojZAg`IABPrJSQZJKJIIXjJIHjYQIXQPJIKIXxffjZj`hJhHHfjj`b@@@	CN1CCC(CC1)NC(=O)c2ccc(c(c2)OC)Nc3ncc4c(n3)N(CC(C(=O)N4C)(F)F)C5CCCC5	79C	NaN
4CLB	A	Atkinson, S.J., Soden, P.E., Angell, D.C., Bantscheff, M., Chung, C., Giblin, K.A., Smithers, N., Furze, R.C., Gordon, L., Drewes, G., Rioja, I., Witherington, J., Parr, N.J., Prinjha, R.K.	2014		1.6	eg`\L@@LKC`DBlbbRbabTRRVfaRrQegbTrsUUPTEDp@UPHTPr@@	C[C@H]1C[C@H](c2cc(ccc2N1C(=O)C)c3ccc(cc3)CNC)NC(=O)OC(C)C	83T	NaN
5UEP	A	Park, C.H.			1.77	f`qa`@I@M[HhheEMYdpWIMSMTuT@@	CCOC(=O)c1c2c(c([nH]1)C)C(=O)CCC2	88P	NaN		25000
5XI4	A	Xiong, B., Cao, D., Li, Y.			1.49	fewq@@DLBCHhhhileEThidlpQoV]t[UTDEET@EDHqHh@	Cc1ccc(cc1)[C@H](C)Nc2ccc3c(c2)N([C@H](C(=O)N3C)C)C4CC4	8F0	NaN
5XI3	A	Xiong, B., Cao, D., Li, Y.			1.67	figq@@DLBCHhhhileEThidfBMzsncZj``hj`@bDXTX@	C[C@@H]1C(=O)N(c2ccc(cc2N1C3CC3)N[C@H](C)c4ccccc4)C	8F6	NaN
5XI2	A	Xiong, B., Cao, D., Li, Y.			1.91	fewq@@DLBCHhhhileEThidlpQoV]t[UTDEET@EDHphh@	Cc1ccc(cc1)[C@H](C)Nc2ccc3c(c2)N([C@@H](C(=O)N3C)C)C4CC4	8F9	NaN
5XHY	A	Bing, X.			1.98	fc qb@L^KAFpAFRREQQIIZYQZQQKSkAKT\uj@@@bjjjPh@@	Cc1ccc(cc1)S(=O)(=O)Nc2ccc3c(c2)N(C(C(=O)N3C)(C)C)C4CC4	8FC	NaN
5N2M	A	Tallant, C., Slavish, P.J., Siejka, P., Bharatham, N., Shadrick, W.R., Chai, S., Young, B.M., Boyd, V.A., Heroven, C., Wiggers, H.J., Picaud, S., Fedorov, O., Krojer, T., Chen, T., Lee, R.E., Guy, R.K., Shelat, A.A., von Delft, F., Arrowsmith, C.H., Edwards, A.M., Bountra, C., Knapp, S., Structural Genomics Consortium (SGC)			1.54	eoh\B@@LKE`DBklbbRbabTRRVfaRftLl|RfvZjjB`hf@Hf`Phad@@	C[C@H]1C[C@H](c2cc(ccc2N1C(=O)C)c3cccc(c3)NC(=O)C)NC(=O)OC(C)C	8J2	NaN
5UVV	A	Park, C.H.			1.99	ec`\LH@GHbhDI`@cIICDeiheDhhelYIhDeETTtmlmAADsUTttUP@@	CCS(=O)(=O)c1ccc2c(c1)C3=CN(C(=O)c4c3c(c[nH]4)CN2CC5CC5)C	8NS	NaN
5YOU	A	Bing, X., Jianping, H., Yanlian, L., Danyan, C.			1.5	fmop`@DLRBNQQQQSYJJjZJYKLD[ugCfuUAAQMP@TQCB@@	Cc1ccc(cc1)N(C)C(=O)c2ccc3c(c2)N([C@@H](C(=O)N3C)C)C4CC4	8XX	NaN
5Z5T	A	Chen, W., Zhang, H., Chen, Z., Jiang, H., Liao, L., Fan, S., Xing, J., Xie, Y., Chen, S., Ding, H., Chen, K., Jiang, H., Luo, C., Zheng, M., Yao, Z., Huang, Y., Zhang, Y.	2018	10.1038/s41389-018-0093-z	1.99	fhyI@@BJMxFQQQISQVILdKW`p@@QThP@@	c1cc2c(cc(nc2c(c1)O)N)n3ccnc3	96R	NaN
5Z5U	A	Chen, W., Zhang, H., Chen, Z., Jiang, H., Liao, L., Fan, S., Xing, J., Xie, Y., Chen, S., Ding, H., Chen, K., Jiang, H., Luo, C., Zheng, M., Yao, Z., Huang, Y., Zhang, Y.	2018	10.1038/s41389-018-0093-z	1.63	fdeH`@BZlDBlbbbRbTSbSIBLFL@@EERa@@@	c1cn(cn1)c2cc(nc3c2cc(cc3O)O)N	96U	NaN
5Z8G	A	Xiao, S., Chen, S., Chen, H.			1.7	figPR@LY`awPAFRRFJIJISQUSKJ}XJZyJmTE@TAQMAPd`@	CCN1c2ccc(c3c2c(ccc3)C1=O)S(=O)(=O)N4CCC[C@H](C4)O	99L	NaN
5Z8R	A	Xiao, S., Chen, S., Chen, H.			2	figPR@LY`awPAFRRFJIJISQUSKJ}XJZyJmTE@TAQMAPe@@	CCN1c2ccc(c3c2c(ccc3)C1=O)S(=O)(=O)N4CCC[C@@H](C4)O	99O	NaN
5Z8Z	A	Xiao, S., Chen, S., Chen, H.			1.8	figqb@LNsAGPAFRRFJIJISQUSKJ}XJZyJmTE@TAQMAPe@@	CCN1c2ccc(c3c2c(ccc3)C1=O)S(=O)(=O)N4CCC[C@@H](C4)N	99R	NaN
5Z9K	A	Xiao, S., Chen, S., Chen, H.			1.89	figPR@LY`cwPAFRRFJJIQ[QESKRtxJZyJmTEPDAQMAPh`@	CCN1c2ccc(c3c2c(ccc3)C1=O)S(=O)(=O)N4CCC[C@@H]4CO	99X	NaN
6AJY	A	Yokoyama, T., Matsumoto, K., Ostermann, A., Schrader, T.E., Nabeshima, Y., Mizuguchi, M.	2019	10.1111/febs.14736	1.6	fbu@P@@\]yIfVWyYvVhyZA``JB@ABd@	COc1ccccc1/C=C/C(=O)c2ccc(cc2O)O	A0R	NaN
5OVB	A	Batiste, L., Unzue, A., Dolbois, A., Hassler, F., Wang, X., Deerain, N., Zhu, J., Spiliotopoulos, D., Nevado, C., Caflisch, A.	2018	10.1021/acscentsci.7b00401	1.95	e`\\B@@DDn`JBglbbTTRRLRfbbRRRvdbaccRwPsUHTDPMALULa@@@	CCOc1ccc(cc1c2cc(cc(c2)NC(=O)c3ccco3)c4ccn(n4)C)C(=O)C	AY2	NaN
5OWM	A	Batiste, L., Unzue, A., Dolbois, A., Hassler, F., Wang, X., Deerain, N., Zhu, J., Spiliotopoulos, D., Nevado, C., Caflisch, A.	2018	10.1021/acscentsci.7b00401	1.5	fluq@@GARCHeDeBhdihf\mxJZ@B`BJ`P@@	Cn1c2cc(ccc2nn1)Cc3cccc(c3)CO	B0N	NaN
5OWW	A	Batiste, L., Unzue, A., Dolbois, A., Hassler, F., Wang, X., Deerain, N., Zhu, J., Spiliotopoulos, D., Nevado, C., Caflisch, A.	2018	10.1021/acscentsci.7b00401	1.5	figY@@DTY{MPYEDhheDbihhdkIU`ykt[TpUAPEPBH@@	Cn1c2cc(ccc2nn1)NC(=O)c3nccn3Cc4ccccc4	B0Q	NaN
4IOO	A	Lolli, G., Battistutta, R.	2013	10.1107/S090744491301994X	1.25	dazH@DAIeijj@@	CC(C)(C)C(=O)NC	BAE	NaN
4IOQ	A	Lolli, G., Battistutta, R.	2013	10.1107/S090744491301994X	1.5	gFy@DDfTujh@	C1CC(=O)NC1	BAQ	NaN
6V0U<NL>5IGK	A	Karim, R.M., Chan, A., Zhu, J.Y., Schonbrunn, E.<NL>Picaud, S., Leonards, K., Lambert, J.P., Dovey, O., Wells, C., Fedorov, O., Monteiro, O., Fujisawa, T., Wang, C.Y., Lingard, H., Tallant, C., Nikbin, N., Guetzoyan, L., Ingham, R., Ley, S.V., Brennan, P., Muller, S., Samsonova, A., Gingras, A.C., Schwaller, J., Vassiliou, G., Knapp, S., Filippakopoulos, P.	2020<NL>2016	10.1021/acs.jmedchem.9b01980<NL>10.1126/sciadv.1600760	1.4<NL>1.7	fcoXR@LV}dmXHGL@QddatTRvbRbRblrUhLRuVhBBZZeijJ@@	CCOC(=O)Nc1cc(nn2c1nnc2C)c3ccc(c(c3)NS(=O)(=O)C)C	BMF	NaN			<NL>41.8 (BMOAD_5725)
6JI4	A	Cao, D.Y., Li, Y.L., Du, Z.Y., Li, J., Xiong, B.			1.6	ekhZH@@DFHdl`LbbbbfrTUTRfbRvXDL|l\rjVvZj``hfjB@hd`pP@	Cc1ccc(cc1)n2c(nnc2c3ccc4c(c3)N([C@@H](C(=O)N4C)C)C5CC5)C	BOF	NaN
6JI5	A	Cao, D.Y., Li, Y.L., Du, Z.Y., Li, J., Xiong, B.			2	ea[^D@@DFLbfcfPMlbbbbfrTVRLRbtTTVbJRK@ag`TUSWrIKKUTDEESUPLQQUTRTFB@@	Cc1ccc(c(c1)C)n2c(nc(n2)C(=O)N3CCN(CC3)C)c4ccc5c(c4)N([C@@H](C(=O)N5C)C)C6CCCC6	BQ0	NaN
6JI3	A	Cao, D.Y., Li, Y.L., Du, Z.Y., Li, J., Xiong, B.			2.2	fjcq@@DLbCHhhhileEUDfBMzsleZj``hijIaa@@	C[C@@H]1C(=O)N(c2ccc(cc2N1C3CC3)c4ccc[nH]4)C	BW6	NaN
6JJ5	A	Xu, J., Zhu, J., Chen, Y., Jiang, F.			1.2	ekhRD@@DCHc`MdfYgUn]Wm[bFEKCGDbaefjAB`HH@HZH@@@	CN1C2=Cc3cccnc3N(c4c2c(ccc4)C1=O)Cc5cccc(c5)C(=O)N	C6X	NaN
6JJ6	A	Xu, J., Zhu, J., Chen, Y., Jiang, F.			1.4	elQZD@@DCHchPMlbbbbrRfbrRtrTtLRVHXTlL\RJFVAaZhDJ@``@ajjh``@@	CN1CCN(CC1)C(=O)c2cccc(c2)CN3c4cccc5c4C(=Cc6c3nccc6)N(C5=O)C	C89	NaN
6G0H	A	Humbeck, L., Pretzel, J., Spitzer, S., Koch, O.	2019	10.26434/chemrxiv.11472618.v1	1.91	fk iR@LBCFlDKv\@QddaTTRRVvRbbrRfgV}tZu@@@DpPEL@B@X	c1ccnc(c1)NS(=O)(=O)c2ccc(cc2)/N=N/c3cc(c(cc3N)O)C(=O)O	EGE	NaN
5AD2	A	Waring, M.J., Chen, H., Rabow, A.A., Walker, G., Bobby, R., Boiko, S., Bradbury, R.H., Callis, R., Clark, E., Dale, I., Daniels, D.L., Dulak, A., Flavell, L., Holdgate, G., Jowitt, T.A., Kikhney, A., Mcalister, M., Ogg, D., Patel, J., Petteruti, P., Robb, G.R., Robers, M.B., Saif, S., Stratton, N., Svergun, D.I., Wang, W., Whittaker, D., Wilson, D.M., Yao, Y.	2016	10.1038/nchembio.2210	2.01	edV^DH@DLBJII`Vo`HcHheLeMLeeDeddhheJPpHhyxUT|CMTuUU@AUUTtlTBt@@	C[C@@H]1C(=O)N(CCN1CCOc2ccc(cc2)C3CCN(CC3)c4ccc5nnc(n5n4)Cl)C	ETU	NaN			63 (BMOAD_5704)
6CJ1	A	Wang, J., Erazo, T., Ferguson, F.M., Buckley, D.L., Gomez, N., Munoz-Guardiola, P., Dieguez-Martinez, N., Deng, X., Hao, M., Massefski, W., Fedorov, O., Offei-Addo, N.K., Park, P.M., Dai, L., DiBona, A., Becht, K., Kim, N.D., McKeown, M.R., Roberts, J.M., Zhang, J., Sim, T., Alessi, D.R., Bradner, J.E., Lizcano, J.M., Blacklow, S.C., Qi, J., Xu, X., Gray, N.S.	2018	10.1021/acschembio.7b00638	1.53	ekTqL@@DEKGB`V]PIolbbbbfbRRvfVtTRQTtRVTRVDTLB\bvnIiUuZh@`BBj``bZjjjj@jCr@@	CC[C@@H](C)N1c2ccccc2C(=O)N(c3c1nc(nc3)Nc4ccc(cc4OC)C(=O)N5CCC(CC5)N6CCN(CC6)C)C	F2S	NaN
6HOV	A	Cozza, G., Zonta, F., Dalle Vedove, A., Venerando, A., Dall'Acqua, S., Battistutta, R., Ruzzene, M., Lolli, G.	2019	10.1111/febs.15111	1.85	dg\B@@Q[R[VUmgVf@HhBL`	COc1cc(ccc1O)\C=C\C(=O)O	FER	NaN
6DL2	A	Qin, C., Hu, Y., Zhou, B., Fernandez-Salas, E., Yang, C.Y., Liu, L., McEachern, D., Przybranowski, S., Wang, M., Stuckey, J., Meagher, J., Bai, L., Chen, Z., Lin, M., Yang, J., Ziazadeh, D.N., Xu, F., Hu, J., Xiang, W., Huang, L., Li, S., Wen, B., Sun, D., Wang, S.	2018	10.1021/acs.jmedchem.8b00506	1.47	ffsqB@LZmx@QdbbbbVbbWbRISUc^KViZjYj@Bh@@	Cc1c(c2c(s1)-n3c(nnc3COC2)C)Cc4ccccc4	GUJ	NaN
6DNE	A	Ren, C., Zhang, G., Han, F., Fu, S., Cao, Y., Zhang, F., Zhang, Q., Meslamani, J., Xu, Y., Ji, D., Cao, L., Zhou, Q., Cheung, K.L., Sharma, R., Babault, N., Yi, Z., Zhang, W., Walsh, M.J., Zeng, L., Zhou, M.M.	2018	10.1073/pnas.1720000115	2.96	gguEPPH@A@SItfXaVhuzFW@UHAD^@blDWhcHhdlheEEEDllhkddddeLheEDhhldeCmPXV@gbITzN`wjMVgCmt@DtuTsUMUUUSUKUTEPLTTkBAPnR@@	Cc1c(sc-2c1C(=N[C@H](c3n2c(nn3)C)CC(=O)NCCOCCOCCNC(=O)C[C@H]4c5nnc(n5-c6c(c(c(s6)C)C)C(=N4)c7ccc(cc7)Cl)C)c8ccc(cc8)Cl)C	H1V	NaN
6I7X	A	Picaud, S., Traquete, R., Bernardes, G.J.L., Newman, J., Arrowsmith, C.H., Edwards, A.M., Bountra, C., Filippakopoulos, P., Structural Genomics Consortium (SGC)			1.2	ebQVDH@AODnihVa`HcHhdlheEEDdddhlXTliPqYyETUu|C@AMATCQSUUUQCPJH@	Cc1nnc2n1-c3ccc(cc3C(=N[C@H]2CC(=O)N4CCC(CC4)N(C)C)c5ccc(cc5)Cl)OC	H7B	NaN
6I7Y	A	Picaud, S., Traquete, R., Bernardes, G.J.L., Newman, J., Arrowsmith, C.H., Edwards, A.M., Bountra, C., Filippakopoulos, P., Structural Genomics Consortium (SGC)			1	ecX~DHHAODnidQVa`H`V\bbRrbTTTRRRRbqLRVTRVTeCEgdUQWPLKOL@DtEPMEMT@EUUTPe@h`@	Cc1nnc2n1-c3ccc(cc3C(=N[C@H]2CC(=O)Nc4ccc(cc4)N5CCC(CC5)[N+](C)(C)C)c6ccc(cc6)Cl)OC	H7E	NaN
6AJV<NL>6AJX	A	Yokoyama, T., Matsumoto, K., Ostermann, A., Schrader, T.E., Nabeshima, Y., Mizuguchi, M.	2019	10.1111/febs.14736	1.45<NL>1.89	fle@P@@\\eIfVWyWyZCEhFB@`H@@@	c1cc(ccc1C=CC(=O)c2ccc(cc2O)O)O	HCC	NaN
6Q3Y	A	Watts, E., Heidenreich, D., Tucker, E., Raab, M., Strebhardt, K., Chesler, L., Knapp, S., Bellenie, B., Hoelder, S.	2019	10.1021/acs.jmedchem.8b01947	1.2	efUVD@@DFCKDbPIdfYfuWyU^yW^UvAKOBfmklRVjhJB@``HHjjj@hLD@@	CC[C@@H]1C(=O)N(c2cnc(nc2N1Cc3ccccc3)Nc4ccc(cc4OCC)C5CCN(CC5)C)C	HG5	NaN			54000
6Q3Z	A	Watts, E., Heidenreich, D., Tucker, E., Raab, M., Strebhardt, K., Chesler, L., Knapp, S., Bellenie, B., Hoelder, S.	2019	10.1021/acs.jmedchem.8b01947	2	efUVDH@FEOLbbXi`@cIEEdihheDeD}EDeehdmaPYxEem]bSSMTEDLUAAEUUTEAI@@	CC[C@@H]1C(=O)N(c2cnc(nc2N1Cc3cc(cs3)C)Nc4ccc(cc4OCC)C5CCN(CC5)C)C	HG8	NaN			44000
6E4A	A	Yang, S.M., Urban, D.J., Yoshioka, M., Strovel, J.W., Fletcher, S., Wang, A.Q., Xu, X., Shah, P., Hu, X., Hall, M.D., Jadhav, A., Maloney, D.J.	2018	10.1016/j.bmcl.2018.08.039	1.26	efU^HH@AEO@mclTPHcHhdhTheEDmDdmEdeLmiPqYxeTMm]}@AT@AAQTuMTu@T@@@	CN1C=C(C=CC1=O)c2ccc3c(c2)c(nc(n3)N4CCN(CC4)CCN(C)C)NCc5cccc(c5)Cl	HRY	NaN			44 (BMOAD_5635)
5V67	A	EMBER, S.W., BERNDT, N., ZHU, J.-Y., KARIM, R.M., SCHONBRUNN, E.			1.78	ekTqL@@DFCKHclQPJmlbbbbfRRfjTTRQTrbRrbRrTXDlBzfaQyEuMZj`hJJBBIjjjjjjBjCA@@	CC[C@@H]1C(=O)N(c2cnc(nc2N1C(C)C)Nc3ccc(cc3OC)C(=O)NC4CCC(CC4)N5CCN(CC5)CC6CC6)C	IBI	NaN
4CL9	A	Atkinson, S.J., Soden, P.E., Angell, D.C., Bantscheff, M., Chung, C., Giblin, K.A., Smithers, N., Furze, R.C., Gordon, L., Drewes, G., Rioja, I., Witherington, J., Parr, N.J., Prinjha, R.K.	2014		1.4	eaURF@@LKMfPDBkj^\bbRbabTRRVfaRrTrRRTqegbTrsUUPTEDp@TuUSTBEDL`@	C[C@H]1C[C@H](c2cc(ccc2N1C(=O)C)c3ccc(cc3)NC(=O)CCCCCCC(=O)NO)NC(=O)OC(C)C	IES	NaN
6MAU	A	Yang, S.M., Yoshioka, M., Strovel, J.W., Urban, D.J., Hu, X., Hall, M.D., Jadhav, A., Maloney, D.J.	2019	10.1016/j.bmcl.2019.03.014	2.11	enSVL@@JEDemhPOb\dRTrbbRTVbQbRVfTTSdHhlb|RjFVv~ajj`@@@`dfZijj@jCB@@	Cc1c(c(on1)C)c2ccc3c(c2)c(nc(n3)c4cnn(c4)CC(C)(C)O)N5CCOC[C@@H]5c6ccccc6	JBS	NaN			70
4QZS<NL>3MXF	A	Mishra, N.K., Urick, A.K., Ember, S.W., Schonbrunn, E., Pomerantz, W.C.<NL>Filippakopoulos, P., Qi, J., Picaud, S., Shen, Y., Smith, W.B., Fedorov, O., Morse, E.M., Keates, T., Hickman, T.T., Felletar, I., Philpott, M., Munro, S., McKeown, M.R., Wang, Y., Christie, A.L., West, N., Cameron, M.J., Schwartz, B., Heightman, T.D., La Thangue, N., French, C.A., Wiest, O., Kung, A.L., Knapp, S., Bradner…	2014<NL>2010	10.1021/cb5007344<NL>10.1038/nature09504	1.45<NL>1.6	eodRDDHA@lnai`HcpHBgHhdlheEEEDllhkiJFK@oHjnh@IijijjZjafAQ@@	Cc1c(sc-2c1C(=N[C@H](c3[n+]2c(n[nH]3)C)CC(=O)OC(C)(C)C)c4ccc(cc4)Cl)C	JQ1	NaN			89 (BMOAD_5625)<NL>49 (PDBbind)
6S25	A	Picaud, S., Traquete, R., Bernardes, G.J.L., Tobias, K., von Delft, F., Arrowsmith, C.H., Edwards, A.M., Bountra, C., Filippakopoulos, P., Structural Genomics Consortium (SGC)			1.1	enUVBH@AODniofahTPHcHhdlheEEDdddhlRdeLiJFKOHjbnh@IhJ`ZJZjjZjHXED@@	Cc1nnc2n1-c3ccc(cc3C(=N[C@H]2CC(=O)NCCCNC(=O)OC(C)(C)C)c4ccc(cc4)Cl)OC	KSZ	NaN
5D24	A	Hugle, M., Lucas, X., Weitzel, G., Ostrovskyi, D., Breit, B., Gerhardt, S., Einsle, O., Gunther, S., Wohlwend, D.	2016	10.1021/acs.jmedchem.5b01267	1.65	fikpP@DTFBN^yEDhheDddhYjiIUdmTaTETMSH@@	CCc1c(c([nH]c1C(=O)Nc2cccc(c2)OCC(=O)N)C)C(=O)C	L26	NaN			5800 (BMOAD_5729), 5800 (BDB)
5D26	A	Hugle, M., Lucas, X., Weitzel, G., Ostrovskyi, D., Breit, B., Gerhardt, S., Einsle, O., Gunther, S., Wohlwend, D.	2016	10.1021/acs.jmedchem.5b01267	1.82	fkoIR@LVr^B@qv@HrRPqQIHsIPqJIKPsjmVjB`bffjia@@	CCc1c(c([nH]c1C(=O)Nc2cc(ccc2O)S(=O)(=O)N(CC)CC)C)C(=O)N	L28	NaN			810 (BMOAD_5640), 810 (BDB)
5D3J	A	Hugle, M., Lucas, X., Weitzel, G., Ostrovskyi, D., Breit, B., Gerhardt, S., Einsle, O., Gunther, S., Wohlwend, D.	2016	10.1021/acs.jmedchem.5b01267	1.7	fcwpR@LVSA@U`BLddLTRRLvfbTRVagEjmTEADtuULH@@	CCc1c(c([nH]c1C(=O)Nc2cccc(c2)S(=O)(=O)N(CC)CC)C)C(=O)C	L33	NaN			5700 (BMOAD_5747), 5700 (BDB)
5D3N	A	Hugle, M., Lucas, X., Weitzel, G., Ostrovskyi, D., Breit, B., Gerhardt, S., Einsle, O., Gunther, S., Wohlwend, D.	2016	10.1021/acs.jmedchem.5b01267	2.15	fe{pR@LJCACa`BLddJfRfRabTRVdmIrmPAEMMUSB@@	CCc1c(c([nH]c1C(=O)Nc2cc(ccc2C)S(=O)(=O)NC)C)C(=O)C	L40	NaN			9200 (BMOAD_5638), 9200 (BDB)
4LZS	A	Lucas, X., Wohlwend, D., Hugle, M., Schmidtkunz, K., Gerhardt, S., Schule, R., Jung, M., Einsle, O., Gunther, S.	2013	10.1002/anie.201307652	2.2	do}D@DhKRY[YWnEjfjid@@	CCc1c(c([nH]c1C(=O)NC)C)C(=O)C	L46	NaN			16000 (BMOAD_5644), 6800 (BDB)
4C67	A	Mirguet, O., Gosmini, R., Toum, J., Clement, C., Barnathan, M., Brusq, J., Mordaunt, J.E., Grimes, R., Crowe, M., Pineau, O., Ajakane, M., Daugan, A., Jeffrey, P., Cutler, L., Haynes, A., Smithers, N., Chung, C., Bamborough, P., Uings, I.J., Lewis, T., Witherington, J., Parr, N., Prinjha, R., Nicodeme, E.	2013	10.1021/jm401088k	1.55	fb}HB@LRuX@QdbbTVbbgbRIRVeVSfiZfY`@j@@@	Cc1nnc2n1-c3c(ccs3)C(=NC2)c4ccccc4	L5S	NaN
6SE4	A	Krojer, T., Hassell-Hart, S., Picaud, S., Filippakopoulos, P., Spencer, J., von Delft, F.			1.38	ef\zHL@M@lbnk@EbxHibBbHbHbHa\RLRDRDaDaHSDQD`lrABBaAc@cC``RbQbSaPQQh[jZzDGFjjjijejjBhFJeejebCq@Ox`Tp	Cc1c(sc-2c1C(=N[C@H](c3n2c(nn3)C)CC(=O)NC45C6=C7[Fe]6489123(C7=C85)C4=C9[C]1C2=C34)c1ccc(cc1)Cl)C	L8W	NaN
4LZR<NL>6IN1	A	Lucas, X., Wohlwend, D., Hugle, M., Schmidtkunz, K., Gerhardt, S., Schule, R., Jung, M., Einsle, O., Gunther, S.<NL>Yokoyama, T., Kosaka, Y., Matsumoto, K., Kitakami, R., Nabeshima, Y., Mizuguchi, M.	2013<NL>	10.1002/anie.201307652<NL>	1.85<NL>1.5	fk `p@C@Hfh}yEEDdhUEDeDieFlJWhefuKUUATCTULPU@@	CC(=O)N[C@H]1CCc2cc(c(c(c2C3=CC=C(C(=O)C=C13)OC)OC)OC)OC	LOC	NaN			20000 (BMOAD_5760)<NL>
4NUD	A	Zhang, G., Plotnikov, A.N., Rusinova, E., Shen, T., Morohashi, K., Joshua, J., Zeng, L., Mujtaba, S., Ohlmeyer, M., Zhou, M.-M.	2013	10.1021/jm401334s	1.2	fmwib@LBCFlDK@DYIHUEDdemdhhleiuo]FmP@@ALDAP@HA`	Cc1cc(c(cc1O)N)/N=N/c2ccc(cc2)S(=O)(=O)Nc3ccccn3	NUD	NaN		85-340 (BDB), 84.5 (BMOAD_5672)
4NUE	A	Zhang, G., Plotnikov, A.N., Rusinova, E., Shen, T., Morohashi, K., Joshua, J., Zeng, L., Mujtaba, S., Ohlmeyer, M., Zhou, M.-M.	2013	10.1021/jm401334s	1.3	fcoib@LBCFlD[@DYIHUEDdemdhhmDmNm{huj@@@I``J`@PC@	Cc1cc(c(c(c1O)C)N)/N=N/c2ccc(cc2)S(=O)(=O)Nc3ccccn3	NUE	NaN		150-440 (BDB), 150 (BMOAD_5606)
6TPX	A	Wellaway, C.R., Amans, D., Bamborough, P., Barnett, H., Bit, R.A., Brown, J.A., Carlson, N.R., Chung, C.W., Cooper, A.W.J., Craggs, P.D., Davis, R.P., Dean, T.W., Evans, J.P., Gordon, L., Harada, I.L., Hirst, D.J., Humphreys, P.G., Jones, K.L., Lewis, A.J., Lindon, M.J., Lugo, D., Mahmood, M., McCleary, S., Medeiros, P., Mitchell, D.J., O'Sullivan, M., Le Gall, A., Patel, V.K., Patten, C., Poole,…	2020	10.1021/acs.jmedchem.9b01670	1.48	e`\RL@@DICC`MglbbTrTrRTRRbbRQJ`bfafSRqsT@PuAAQUULQ@@@	Cc1cc(cc(c1O)C)c2nc3cc(ccc3n2CC4CCN(CC4)C(=O)C)C(=O)NC	NUW	NaN
6UVJ	A	Johnson, J.A., Nicolaou, C.A., Kirberger, S.E., Pandey, A.K., Hu, H., Pomerantz, W.C.K.	2019	10.1021/acsmedchemlett.9b00414	1.38	f`q`a@IV\@HXDYHheDdlYaRUjjijijXPP@	COC(=O)N1CC[C@H](SCC1)c2cccs2	QJ1	NaN
6UVM	A	Johnson, J.A., Nicolaou, C.A., Kirberger, S.E., Pandey, A.K., Hu, H., Pomerantz, W.C.K.	2019	10.1021/acsmedchemlett.9b00414	1.51	foAaA@FV@D\BDiYYUydmFijfjZXHP@	CC(=O)N1CC[C@H](SC=C1)c2cccs2	QJA	NaN
6UWX	A	Johnson, J.A., Nicolaou, C.A., Kirberger, S.E., Pandey, A.K., Hu, H., Pomerantz, W.C.K.	2019	10.1021/acsmedchemlett.9b00414	1.31	fhi`a@IV\@HXDYHheDdlYdJRmUUMUMTp``@	CCOC(=O)N1CC[C@H](SCC1)c2cccs2	QKD	NaN
6V1U	A	Karim, R.M., Chan, A., Zhu, J.Y., Schonbrunn, E.	2020	10.1021/acs.jmedchem.9b01980	1.73	figp`@DAbCnQQJJIFYSQIIZ\DkTTeZuAPEMRuMD`@@	Cc1ccc(cc1c2cc(n3c2nccc3)C(=O)C)C(=O)NC4CC4	QMG	NaN
6G0G	A	Humbeck, L., Pretzel, J., Spitzer, S., Koch, O.	2019	10.26434/chemrxiv.11472618.v1	1.48	fcoIR@LBCFBIkv@HrRPjJIIK[IQISJZ][s^kT@@@S@AS@@`F@	c1ccnc(c1)NS(=O)(=O)c2ccc(cc2)/N=N/c3ccc(c(c3)C(=O)O)O	SAS	NaN
3SVF	A	Filippakopoulos, P., Picaud, S., Felletar, I., von Delft, F., Arrowsmith, C.H., Edwards, A.M., Weigelt, J., Bountra, C., Knapp, S.			1.98	fnspP@DXjCgliLrvjn|sLDYvZmUTPQSTpTBP@	Cc1c(c(on1)C)c2ccc3c(c2)[C@@H](N(C(=O)N3)C)OCCO	WDR	NaN
6CJ2	A	Xu, X., Blacklow, S.C.			1.47	ebQ^D@@DEKGBkdPElbbbbfbRRvfJbRfVbRpba`SdTvtJKU@D@PUPAEUUPD@@@	CC(C)N1c2ccccc2C(=O)N(c3c1nc(nc3)Nc4ccc(c(c4)OC)N5CCN(CC5)C)C	X27	NaN
5W55	A	Xu, X., Blacklow, S.C.			1.35	emPqL@@DEKGLgbYPNklbbbbfbRRvvTTRQTtRVTRVDTLB\bfvQqEeZh@`BBhHHfjjjj`J@@@	CCN1c2ccccc2C(=O)N(c3c1nc(nc3)Nc4ccc(cc4OC)C(=O)N5CCC(CC5)N6CCN(CC6)C)C	X30	NaN
