# Supplementary material for: Structural variation of protein–ligand complexes of the first bromodomain of BRD4
Source: Royal Society of Chemistry journal article supplement (doi:10.1039/d1ob00658d), 2021-01-01
Supplement: d1ob00658d2.csv [file d1ob00658d2.csv]

							Water Occupancy (Y if present in crystal structure)
PDB ID	HET ID	pIC50	IC50 (nM)	Ki (nM)	Kd (nM)		#1	#2	#3	#4	#5	#6	#7	#8	#9	#10	#11	#12
2YEL	WSH	7.809668	15.5		19-52.5 (BDB), 52.5 (PDBbind)		Y	Y	Y	Y	Y	Y	Y	Y	Y	Y	Y	N
3P5O	EAM	6.130768	740	32-39 (BDB)	50.5 (BMOAD_5628), 50.5 (PDBbind), 48-99 (BDB)		Y	Y	Y	Y	Y	Y	Y	Y	Y	Y	Y	N
3U5J	08H	NaN			2460 (BMOAD_5662), 2460 (BDB), 2460 (PDBbind)		Y	Y	Y	Y	Y	Y	Y	Y	Y	N	Y	N
3U5L	08K	NaN			640 (BMOAD_5665), 640 (BDB), 640 (PDBbind)		Y	Y	Y	Y	Y	Y	Y	Y	Y	Y	Y	N
3ZYU	1GH	7	100	9-75 (BDB)	53-215 (BDB), 100 (PDBbind)		Y	Y	Y	Y	Y	Y	N	Y	Y	Y	N	Y
4BW2	UTH	5.199971	6310				Y	Y	Y	Y	Y	Y	Y	Y	Y	Y	N	N
4BW4	9B6	6.200659	630				Y	Y	Y	Y	Y	Y	Y	Y	Y	Y	N	Y
4CFL	8DQ	5.043351	9050		1330 (BMOAD_5647)		Y	Y	Y	Y	Y	Y	N	Y	Y	Y	Y	N
4CLB	83T	6.55					Y	Y	Y	Y	Y	Y	Y	Y	Y	Y	N	Y
4GPJ	0Q1	5.9					Y	Y	Y	Y	N	Y	Y	Y	Y	N	Y	N
4HBW	14Z	5.318759	4800				Y	Y	Y	Y	Y	Y	Y	Y	N	N	N	Y
4HXL	1A9	5.657577	2200				Y	Y	Y	Y	Y	Y	Y	Y	Y	N	N	N
4HXR	1A4	5.387216	4100				Y	Y	Y	Y	Y	Y	Y	Y	N	N	Y	Y
4J0R	1H2	6.413413	386		360 (BDB)		Y	Y	Y	Y	Y	Y	Y	Y	Y	N	N	N
4J3I	1K0	5.05	8930		135-8930 (BDB), 8930 (BMOAD_5642)<NL>1142 (PDBbind), 135-8930 (BDB)		Y	Y	Y	Y	Y	Y	Y	Y	Y	N	N	N
4LYW	21Q	NaN			237 (BMOAD_5737), 240 (BDB)		Y	Y	Y	Y	Y	Y	Y	Y	Y	N	N	N
4LZR	LOC	NaN			20000 (BMOAD_5760)<NL>		Y	Y	Y	Y	Y	Y	Y	Y	Y	N	N	N
4MEP	24Y	5.327902	4700				Y	Y	Y	Y	Y	Y	Y	Y	Y	N	N	N
4NQM	Y1Z	6.8	158.49				Y	Y	Y	Y	Y	Y	Y	Y	Y	N	N	N
4NR8	2LL	5.39	4100				Y	Y	Y	Y	Y	Y	Y	Y	Y	N	N	N
4NUE	NUE	NaN		150-440 (BDB), 150 (BMOAD_5606)			Y	Y	Y	Y	Y	Y	Y	Y	Y	N	N	N
4O76	1M3	6.886057	130		123 (BDB)		Y	Y	Y	Y	Y	Y	Y	Y	Y	N	N	N
4O78	SAV	5.337242	4600				Y	Y	Y	Y	Y	Y	Y	Y	Y	N	N	N
4O7C	2RK	5	10000				Y	Y	Y	Y	Y	Y	Y	Y	Y	N	N	N
4O7E	2RN	5.244125	5700				Y	Y	Y	Y	Y	Y	Y	Y	Y	N	N	N
4PCE	2N0	5.154902	7000				Y	Y	Y	Y	Y	Y	Y	Y	Y	N	N	N
4PCI	2NJ	5.124939	7500				Y	Y	Y	Y	Y	Y	Y	Y	Y	N	N	N
4PS5	2TA	6.537602	290		164 (BDB)<NL>164 (BMOAD_5693), 164 (BDB)		Y	Y	Y	Y	Y	Y	Y	Y	Y	N	N	N
4QB3	30M	NaN			3300->300000 (BDB), 3400 (BMOAD_5643)		Y	Y	Y	Y	Y	Y	Y	Y	Y	N	N	N
4QR3	BNJ	5.853872	1400				Y	Y	Y	Y	Y	Y	Y	Y	Y	N	N	N
4UIY	5V2	5.59998	2512				Y	Y	Y	Y	Y	Y	Y	Y	Y	N	N	N
4UIZ	N1D	6.69897	200				Y	Y	Y	Y	Y	Y	N	Y	Y	N	Y	N
4WIV	3P2	6.195861	637		550 (BDB), 550 (BMOAD_5627)		Y	Y	Y	Y	Y	Y	Y	Y	Y	Y	N	N
4XY9	43U	NaN			7651 (BMOAD_5755)		Y	Y	Y	Y	Y	Y	Y	N	N	N	N	N
4Z1S	559	6.102373	790				Y	Y	Y	Y	Y	Y	Y	Y	Y	N	Y	N
4ZW1	4V1	6.37	430				Y	Y	Y	Y	Y	Y	N	Y	N	N	N	N
5A5S	NP8	5.886057	1300				Y	Y	Y	Y	Y	Y	Y	N	Y	N	N	N
5ACY	9S3	6.400117	398		6.4 (BMOAD_5730)		Y	Y	Y	Y	Y	Y	Y	N	Y	Y	N	N
5AD2	ETU	NaN			63 (BMOAD_5704)		Y	Y	Y	Y	Y	Y	Y	Y	N	N	N	Y
5AD3	K6K	8.102373	7.9				Y	Y	Y	Y	Y	Y	Y	Y	Y	N	N	N
5COI	55K	5.58838	2580				Y	Y	Y	Y	Y	Y	Y	N	N	N	N	N
5CP5	EB0	5.815309	1530		1234 (BDB), 1234 (BMOAD_5708)		Y	Y	Y	Y	Y	Y	Y	Y	N	Y	Y	N
5CPE	EB2	6.346787	450				Y	Y	Y	Y	Y	Y	Y	N	N	Y	N	N
5D0C	E0B	5.497573	3180		2340 (BDB)		Y	Y	Y	Y	Y	Y	N	N	N	Y	Y	N
5D24	L26	NaN			5800 (BMOAD_5729), 5800 (BDB)		Y	Y	Y	Y	Y	N	Y	N	Y	Y	N	Y
5D3N	L40	NaN			9200 (BMOAD_5638), 9200 (BDB)		Y	Y	Y	Y	Y	Y	Y	Y	Y	N	N	Y
5D3P	57E	NaN			7400 (BMOAD_5677)		Y	Y	Y	Y	Y	Y	Y	Y	Y	Y	N	N
5D3S	579	NaN			1300 (BMOAD_5736), 1300 (BDB)		Y	Y	Y	Y	Y	Y	Y	Y	Y	N	N	N
5D3T	56Y	NaN			12000 (BMOAD_5752), 12000 (BDB)		Y	Y	Y	Y	Y	Y	Y	N	N	N	N	N
5DLX	5D2	NaN			2000 (BMOAD_5632)		Y	Y	Y	Y	Y	N	Y	Y	N	N	N	N
5DLZ	5D1	NaN			1800 (BMOAD_5680)		Y	Y	Y	Y	N	N	N	N	Y	N	N	N
5DW2	5GD	NaN			185 (BMOAD_5676)		Y	Y	Y	Y	Y	Y	Y	Y	Y	N	N	N
5DX4	E0C	6.387216	410		137 (BDB)		Y	Y	Y	Y	Y	Y	Y	Y	Y	N	N	N
5EGU	5NQ	5.30103	5000		1400 (BDB)		Y	Y	Y	Y	Y	N	Y	Y	N	Y	N	N
5EIS	5OU	5.585027	2600		1800 (BDB)		Y	Y	Y	Y	Y	Y	Y	Y	N	Y	Y	Y
5F62	5W1	NaN			6.8 (BMOAD_5735)		Y	Y	Y	Y	Y	Y	Y	Y	Y	N	Y	N
5F63	5W2	NaN			12 (BMOAD_5618)		Y	Y	Y	Y	Y	Y	Y	Y	Y	N	Y	N
5FBX	5W4	7.85					Y	Y	Y	Y	Y	Y	Y	Y	Y	N	N	N
5H21	RMR	5.19382	6400				Y	Y	Y	Y	Y	Y	Y	Y	N	Y	N	N
5HLS	62G	7.408935	39				Y	Y	Y	Y	Y	Y	Y	Y	Y	Y	N	N
5HM0	62V	6.356547	440				Y	Y	Y	Y	Y	Y	Y	Y	Y	N	N	N
5I88	69G	6.337242	460				Y	Y	N	N	Y	Y	Y	Y	Y	Y	N	Y
5IGK	BMF	NaN			41.8 (BMOAD_5725)<NL>		Y	Y	Y	Y	Y	N	Y	N	N	Y	N	N
5KDH	6RX	NaN		370 (BMOAD_5727)			Y	Y	Y	Y	Y	Y	Y	Y	N	Y	N	N
5KJ0	6TB	6.886057	130				Y	Y	Y	Y	Y	Y	N	Y	Y	Y	N	N
5KU3	6XH	5.260428	5490				Y	Y	Y	Y	Y	N	N	N	Y	N	Y	N
5LJ1	6XX	5.200659	6300				Y	Y	Y	Y	Y	Y	N	N	Y	N	N	N
5LRQ	4WG	NaN			1600		Y	Y	Y	Y	Y	N	N	Y	N	N	N	N
5LUU	77X	NaN			8630 (BMOAD_5739), 8630-97000 (BDB)		Y	Y	Y	Y	Y	Y	Y	Y	Y	N	Y	Y
5M3A	7.00E+07	5.699622	1997				Y	Y	Y	Y	Y	Y	Y	Y	Y	N	N	N
5U2E	837	6.55752	277				Y	Y	Y	Y	Y	Y	Y	Y	Y	Y	N	N
5ULA	5MJ	NaN		77 (BMOAD_5691)			Y	Y	Y	Y	Y	N	Y	Y	N	N	N	Y
5VOM	9GY	6.102373	790				Y	Y	Y	Y	Y	Y	N	Y	Y	N	N	N
5WMD	6JE	7.59					Y	Y	Y	Y	Y	Y	Y	Y	Y	Y	N	Y
5WUU	7UU	6.091515	810				Y	Y	Y	Y	Y	Y	N	Y	Y	N	Y	N
5XI2	8F9	7.28					Y	Y	Y	Y	Y	Y	Y	Y	Y	Y	N	Y
5Y1Y	HNQ	6.008774	980				Y	Y	Y	Y	Y	Y	Y	Y	N	Y	N	N
5Y8Y	8PX	6.886057	130				Y	Y	Y	Y	Y	Y	Y	Y	N	Y	N	N
5Y93	8Q9	5.643974	2270				Y	Y	Y	Y	Y	Y	Y	Y	N	Y	Y	N
5YQX	E0K	7	100				Y	Y	Y	Y	Y	Y	Y	Y	Y	N	N	N
5Z1S	EFM	6.16					Y	Y	Y	Y	Y	Y	Y	Y	N	Y	Y	N
5Z5V	96X	6.542118	287				Y	Y	Y	Y	Y	Y	Y	Y	N	N	N	N
5Z90	99U	5.72	1910				Y	Y	Y	Y	Y	Y	Y	N	N	N	N	N
6C7R	EO4	8.7	2		2.2 (BMOAD_5639)		Y	Y	Y	Y	Y	Y	Y	Y	Y	Y	N	N
6CJ1	FND	5.199971	6310				Y	Y	Y	Y	Y	Y	Y	Y	Y	N	N	N
6CKR	F5V	7.30103	50				Y	Y	Y	Y	Y	N	N	N	N	N	N	N
6CZU	FP7	6.318759	480				Y	Y	Y	Y	Y	Y	Y	Y	Y	Y	Y	Y
6E4A	HRY	NaN			44 (BMOAD_5635)		Y	Y	Y	Y	Y	Y	N	Y	Y	N	N	Y
6FO5	DZH	6.548214	283				Y	Y	Y	Y	Y	Y	Y	Y	Y	Y	Y	N
6FT3	E5T	6.42					Y	Y	Y	Y	Y	Y	Y	Y	Y	Y	Y	N
6FT4	E5W	6.63					Y	Y	Y	Y	Y	Y	Y	Y	Y	N	Y	N
6G0E	EGN	5.250264	5620				Y	Y	Y	Y	Y	Y	Y	Y	N	N	N	N
6G0F	EGH	6.236572	580				Y	Y	Y	Y	Y	Y	Y	Y	Y	N	Y	N
6HDQ	FZE	8	10				Y	Y	Y	Y	Y	Y	N	Y	Y	Y	Y	N
6JJ3	BS6	7	100				Y	Y	Y	Y	Y	Y	Y	Y	Y	N	N	N
6MAU	JBS	NaN			70		Y	Y	Y	Y	Y	Y	Y	Y	Y	Y	Y	N
6MH1	JQP	5.769551	1700				N	N	N	N	Y	Y	Y	Y	Y	Y	Y	N
6Q3Y	HG5	NaN			54000		Y	Y	Y	Y	Y	N	Y	Y	Y	Y	N	Y
6TPY	NUB	7.1					Y	Y	Y	Y	Y	Y	Y	Y	N	Y	N	Y
6TPZ	NV2	7.9					Y	Y	Y	Y	Y	Y	Y	N	N	N	N	Y
